# Supplementary material for: Main chain selective polymer degradation: controlled by the wavelength and assembly
Source: Royal Society of Chemistry journal article supplement (doi:10.1039/d4sc02172j), 2024-01-01
Supplement: d4sc02172j1.pdf [file d4sc02172j1.pdf]

# Supporting Information

## **Main Chain Selective Polymer Degradation: Controlled by Wavelength and Assembly**

Phuong T. Do,<sup>1,2</sup> Federica Sbordone,<sup>1,2</sup> Henrik Kalmer,<sup>1,2</sup> Anna Sokolova,<sup>6</sup> Chao Zhang,<sup>1,2,5</sup> Linh Duy Thai,<sup>1,2</sup> Dmitri V. Golberg,<sup>1,2</sup> Robert Chapman,<sup>3,4</sup> Berwyck L. J. Poad,<sup>1,2,5\*</sup> Hendrik Frisch<sup>1,2\*</sup>

<sup>1</sup> School of Chemistry and Physics, Queensland University of Technology (QUT), 2 George Street, Brisbane, QLD 4000, Australia.

<sup>2</sup> Centre for Materials Science, Queensland University of Technology (QUT), 2 George Street, Brisbane, QLD 4000, Australia.

<sup>3</sup> Centre for Advanced Macromolecular Design, School of Chemistry, UNSW Sydney, Kensington, NSW 2052, Australia.

<sup>4</sup> School of Environmental and Life Sciences, University of Newcastle, Callaghan, NSW 2308, Australia.

<sup>5</sup> Central Analytical Research Facility, Queensland University of Technology (QUT), 2 George Street, Brisbane, QLD 4000, Australia.

<sup>6</sup> Australian Centre for Neutron Scattering, Australian Nuclear Science and Technology Organisation, New Illawarra Road, Lucas Heights, NSW 2234, Australia.

## Contents

|                                                                                                |    |
|------------------------------------------------------------------------------------------------|----|
| 1. Additional data .....                                                                       | 4  |
| 2. Experimental details .....                                                                  | 13 |
| SEC-ESI-MS .....                                                                               | 13 |
| ESI-HRMS.....                                                                                  | 14 |
| THF-SEC .....                                                                                  | 14 |
| DMAc-SEC.....                                                                                  | 14 |
| NMR Measurements .....                                                                         | 15 |
| UV-VIS Spectroscopy .....                                                                      | 15 |
| Dynamic Light Scattering Measurements .....                                                    | 15 |
| Differential Scanning Calorimetry Measurement.....                                             | 15 |
| Small-Angle Neutron Scattering Measurements.....                                               | 15 |
| Degradation in DMAc with UV light .....                                                        | 16 |
| Degradation in water with UV light.....                                                        | 16 |
| Depolymerization and re-polymerization of a copolymer P(DMA-co-C3).....                        | 16 |
| 3. Synthesis of coumarin cyclic monomer (C3) .....                                             | 17 |
| 4. Synthesis of styrylpyrene cyclic monomer.....                                               | 18 |
| 4.1. SC1 .....                                                                                 | 19 |
| 4.2. SC2 .....                                                                                 | 20 |
| 4.3. SC3 .....                                                                                 | 21 |
| 4.4. SC4 .....                                                                                 | 22 |
| 4.5. SC5 .....                                                                                 | 23 |
| 5. Synthesis of polymer .....                                                                  | 25 |
| 5.1. Synthesis of copolymer of styrylpyrene monomer and DMA .....                              | 25 |
| 5.2. Synthesis of copolymers and diblock copolymers of coumarin based C3 monomer and DMA ..... | 26 |
| 5.3. Synthesis of triblock polymer.....                                                        | 28 |
| 6. Calculation and estimation .....                                                            | 28 |
| 6.1. Estimation of copolymer P1.....                                                           | 28 |
| a) Estimation of degree of polymerization (DP).....                                            | 28 |
| b) Estimation of polymer degradation .....                                                     | 29 |
| 6.2. Estimation of diblock copolymer P2 .....                                                  | 30 |
| a) Estimation of degree of polymerization .....                                                | 30 |
| b) Estimation of polymer degradation .....                                                     | 31 |
| 6.3. Calculation and estimation of triblock copolymer P3 .....                                 | 31 |
| a) Calculation of incorporation ratio of photoresponsive groups.....                           | 31 |
| b) Estimation of degree of polymerization .....                                                | 32 |
| c) Estimation of photodegradation.....                                                         | 33 |
| 7. SANS APENDIX .....                                                                          | 37 |

|                          |    |
|--------------------------|----|
| 8. DOSY APENDIX .....    | 41 |
| Diblock polymer P2 ..... | 41 |
| Triblock polymer P3..... | 44 |

## 1. Additional data

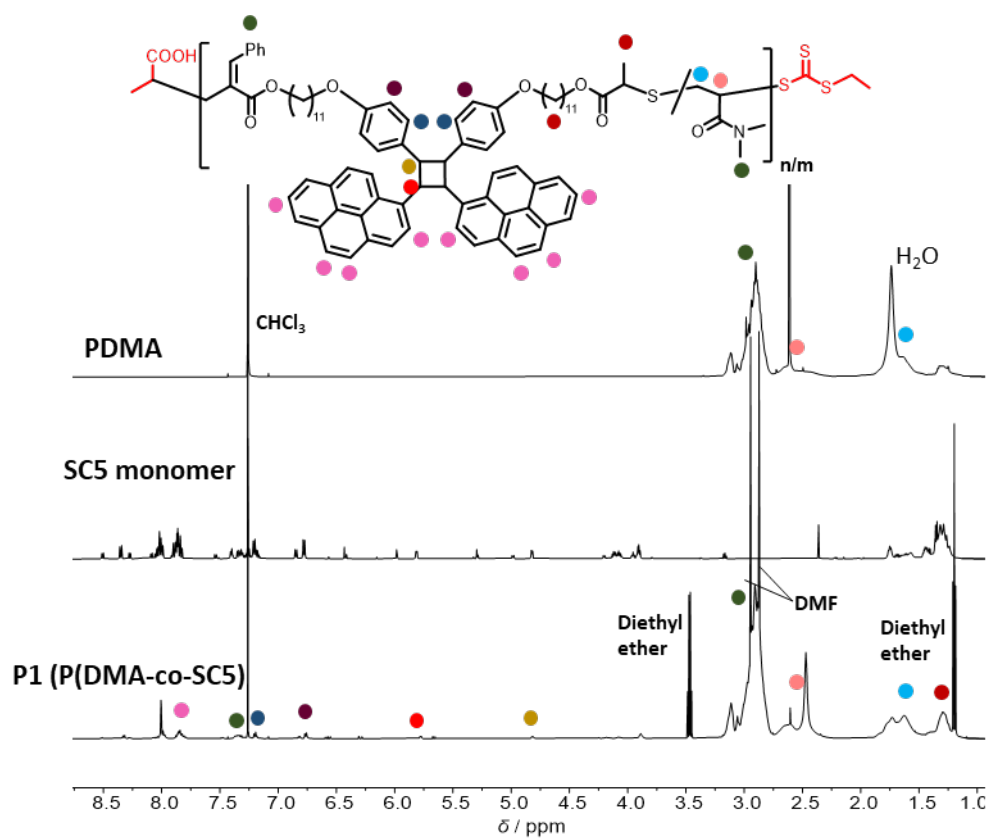

Figure S 1. Stacked  $^1\text{H}$  NMR spectra of homopolymer PDMA, cyclic monomer SC5 and copolymer P1 (P(DMA-co-SC5)) in  $\text{CDCl}_3$  (for the full assignment of SC5 see Fig. S20). Integral of dimethyl proton in PDMA ( $\delta = 2.9$  ppm) is obtained from subtraction of integral of DMF protons.

Table S 1. Table representing simulated mass to charge ratio  $m/z$  (the most abundant peak) of expected DMA oligomers with different numbers of DMA repeat units (chemical structure depicted in figure S3 (bottom)) and  $m/z$  found in the actual mass spectrum of photodegraded copolymer of styrylpyrene monomer and DMA (figure 3D in main manuscript), and their mass deviation.

| charge state 2+ | adduct Na+               |            |             |                    |
|-----------------|--------------------------|------------|-------------|--------------------|
| DMA unit        | Molecular formula of ion | $m/z$ theo | $m/z$ found | $\Delta m/z$ (ppm) |
| 15              | C158H221N15Na2O21S       | 1371.8113  | 1371.8136   | 1.68               |
| 16              | C163H230N16Na2O22S       | 1421.3455  | 1421.3489   | 2.39               |
| 17              | C168H239N17Na2O23S       | 1470.8797  | 1470.8821   | 1.63               |
| 18              | C173H248N18Na2O24S       | 1520.4139  | 1520.4167   | 1.84               |
| 19              | C178H257N19Na2O25S       | 1569.9481  | 1569.9508   | 1.72               |
| 20              | C183H266N20Na2O26S       | 1619.4823  | 1619.4847   | 1.48               |
| 21              | C188H275N21Na2O27S       | 1669.5182  | 1669.5215   | 1.98               |
| 22              | C193H284N22Na2O28S       | 1719.0524  | 1719.0552   | 1.63               |
| 23              | C198H293N23Na2O29S       | 1768.5866  | 1768.5892   | 1.47               |
| 24              | C203H302N24Na2O30S       | 1818.1208  | 1818.1241   | 1.82               |
| 25              | C208H311N25Na2O31S       | 1867.655   | 1867.6578   | 1.50               |
| 26              | C213H320N26Na2O32S       | 1917.1892  | 1917.192    | 1.46               |
| 27              | C218H329N27Na2O33S       | 1966.7234  | 1966.7267   | 1.68               |
| 28              | C223H338N28Na2O34S       | 2016.2576  | 2016.2603   | 1.34               |
| 29              | C228H347N29Na2O35S       | 2065.7918  | 2065.7939   | 1.02               |
| 30              | C233H356N30Na2O36S       | 2115.326   | 2115.3284   | 1.13               |

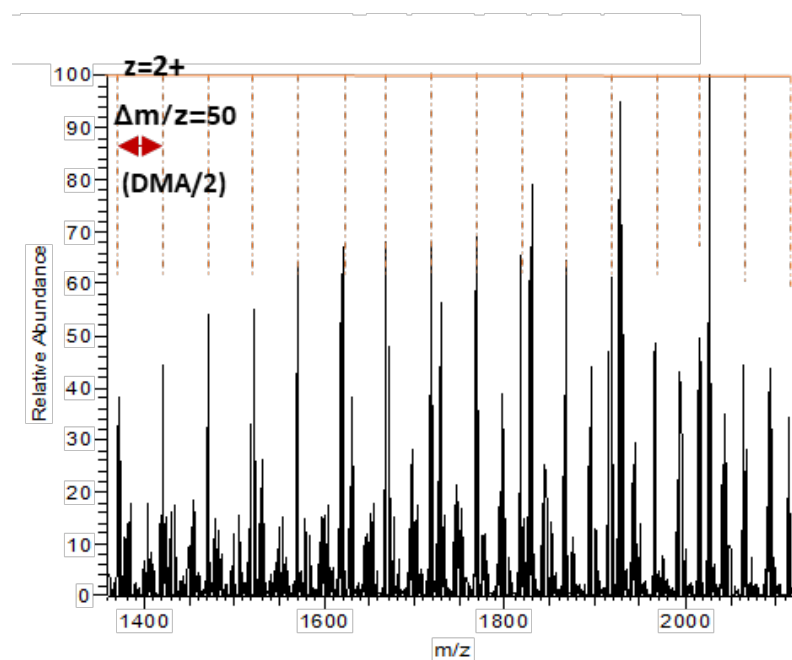

Figure S 2. Mass spectrum at elution time 19.0 mins acquired from SEC-MS measurement of the copolymer **PI** irradiated with UVA 30 min.

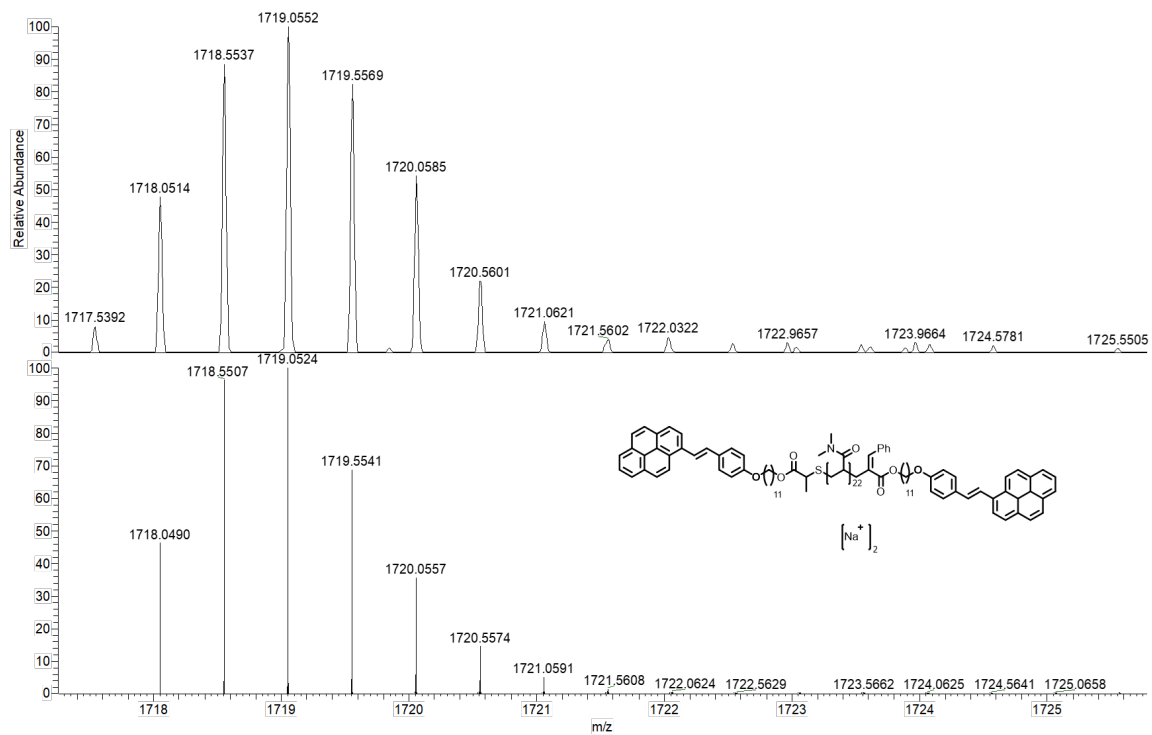

Figure S 3. A zoom in of mass spectrum of retention time 19.0 min for degraded copolymer of styrylpyrene monomer **SC5** and DMA (upper) and the simulated for doubly charged sodiated oligomer ion with 22 DMA unit and expected styrylpyrene end groups (lower), showing good agreement between found  $m/z$  and simulated  $m/z$ .

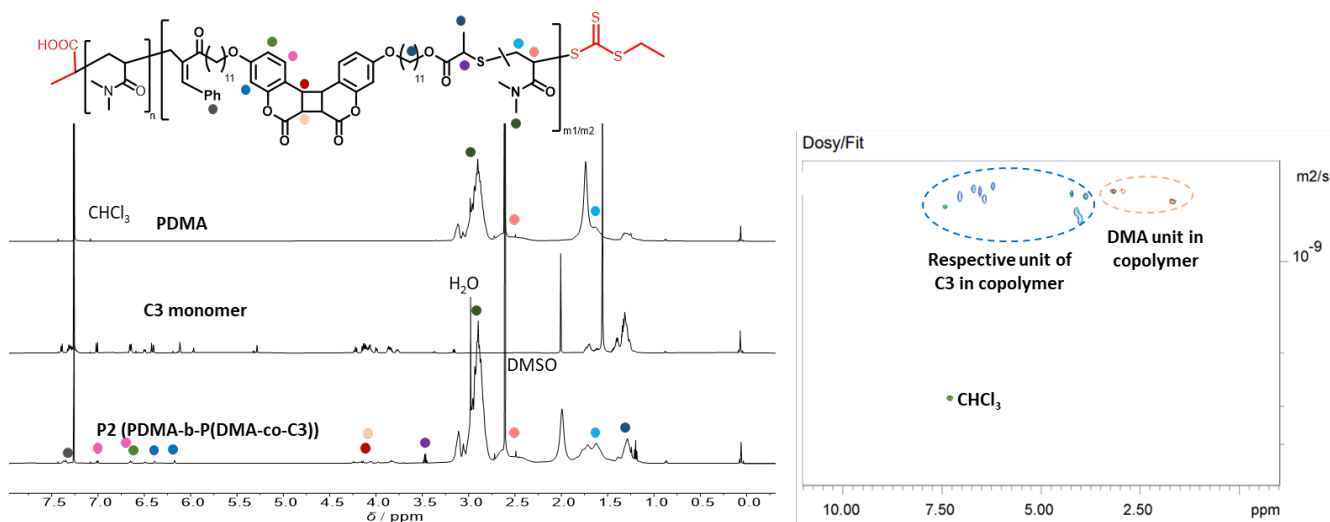

Figure S 4. Left: Stacked  $^1\text{H}$  NMR spectra of homopolymer PDMA, cyclic monomer **C3** and diblock copolymer **P2** (PDMA-*b*-P(DMA-co-C3)) in  $\text{CDCl}_3$  (for a full assignment of **C3** see Fig. S13); Right: DOSY NMR of polymer **P2** showing similar diffusion coefficients for coumarin and DMA, indicative of successful chain extension and copolymerization;

Table S 2. Table representing simulated mass to charge ratio  $m/z$  (the most abundant peak) of expected DMA oligomers with different numbers of DMA repeat units (chemical structure depicted in figure S7 (bottom)) and  $m/z$  found in the actual mass spectrum of photodegraded diblock copolymer of coumarin monomer **C3** and DMA (figure 6D in main manuscript), and their mass deviation.

| charge state 2+ | adduct $\text{Na}^+$      |            |             |                    |
|-----------------|---------------------------|------------|-------------|--------------------|
| DMA unit        | Molecular formular of ion | $m/z$ theo | $m/z$ found | $\Delta m/z$ (ppm) |
| 20              | C153H246N20Na2O30S        | 1461.3939  | 1461.399    | 3.49               |
| 21              | C158H255N21Na2O31S        | 1510.9281  | 1510.9252   | -1.92              |
| 22              | C163H264N22Na2O32S        | 1560.4623  | 1560.4667   | 2.82               |
| 23              | C168H273N23Na2O33S        | 1609.9965  | 1610.0028   | 3.91               |
| 24              | C173H282N24Na2O34S        | 1659.5307  | 1659.5353   | 2.77               |
| 25              | C178H291N25Na2O35S        | 1709.0649  | 1709.0613   | -2.11              |
| 26              | C183H300N26Na2O36S        | 1758.5991  | 1758.6034   | 2.44               |
| 27              | C188H309N27Na2O37S        | 1808.635   | 1808.6387   | 2.05               |
| 28              | C193H318N28Na2O38S        | 1858.1692  | 1858.1743   | 2.74               |
| 29              | C198H327N29Na2O39S        | 1907.7034  | 1907.7054   | 1.05               |
| 30              | C203H336N30Na2O40S        | 1957.2376  | 1957.2439   | 3.22               |
| 31              | C208H345N31Na2O41S        | 2006.7718  | 2006.777    | 2.59               |
| 32              | C213H354N32Na2O42S        | 2056.306   | 2056.3105   | 2.19               |
| 33              | C218H363N33Na2O43S        | 2105.8402  | 2105.8435   | 1.57               |
| 34              | C223H372N34Na2O44S        | 2155.3744  | 2155.3774   | 1.39               |
| 35              | C228H381N35Na2O45S        | 2204.9087  | 2204.9158   | 3.22               |
| 36              | C233H390N36Na2O46S        | 2254.4429  | 2254.4473   | 1.95               |
| 37              | C238H399N37Na2O47S        | 2303.9771  | 2303.9812   | 1.78               |

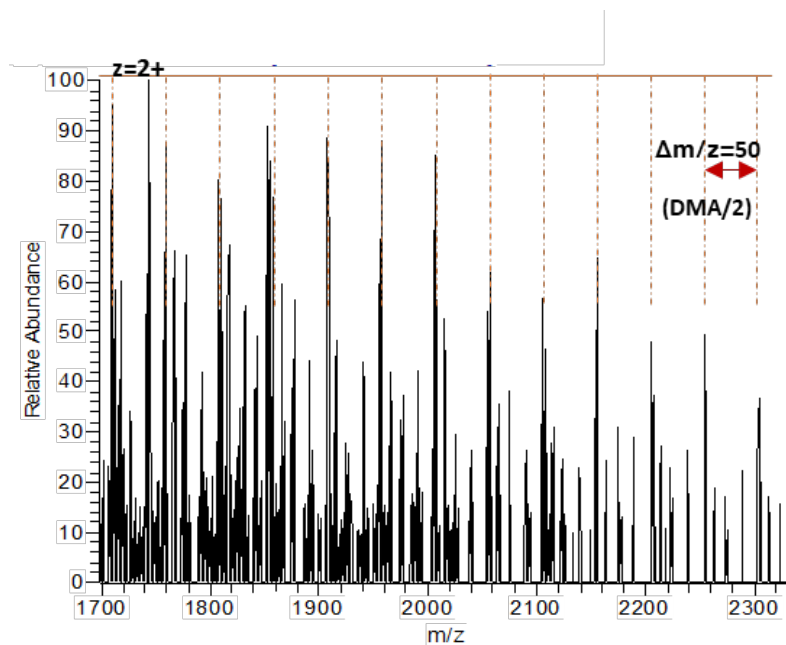

Figure S 5. Mass spectrum at elution time 20.45 min acquired from SEC-MS measurement of copolymer **P2** irradiated with UVB 30 min.

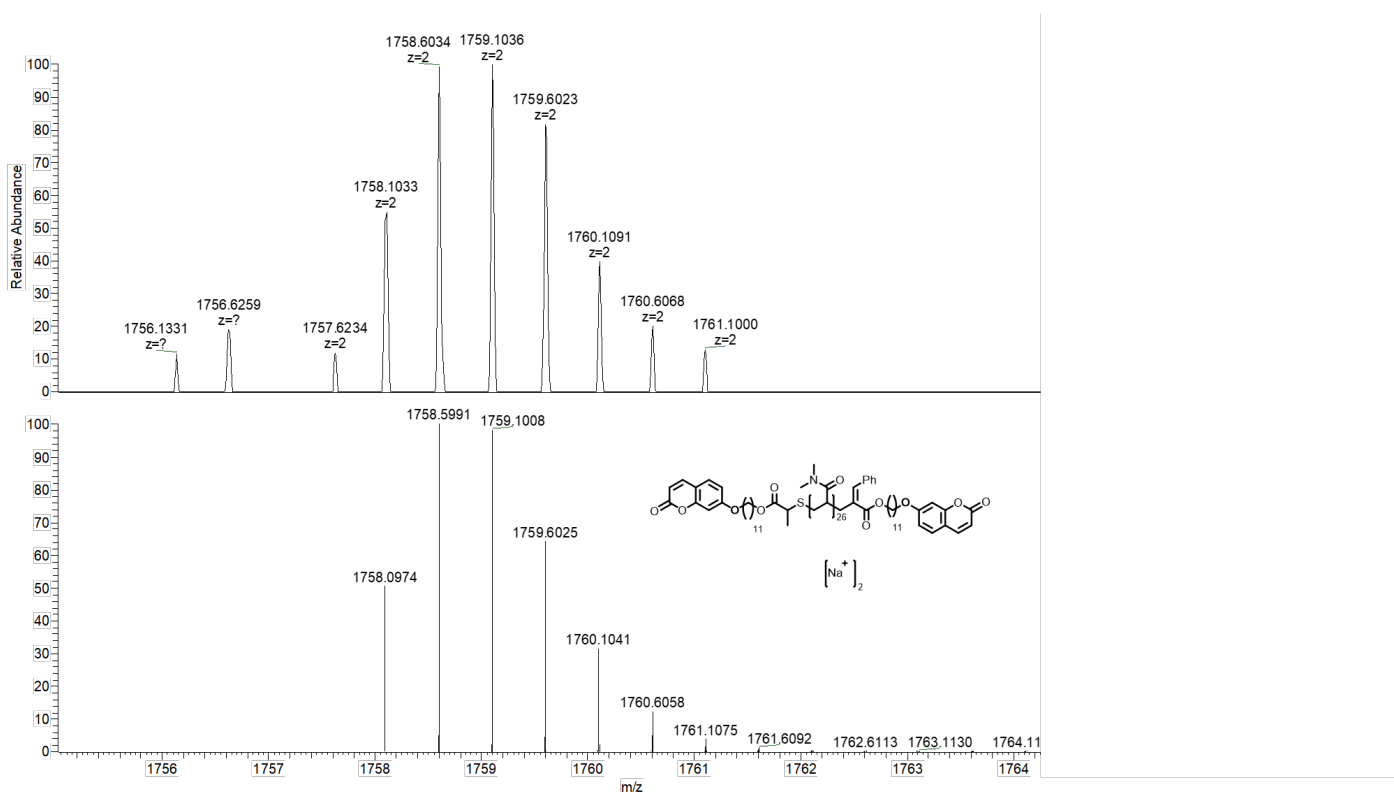

Figure S 6. A zoom in of mass spectrum of retention time 20.45 min for degraded diblock copolymer of coumarin monomer **C3** and DMA (upper) and the simulated for doubly charged sodiated oligomer ion with 26 DMA unit and expected coumarin end groups (lower), showing good agreement between found  $m/z$  and simulated  $m/z$ .



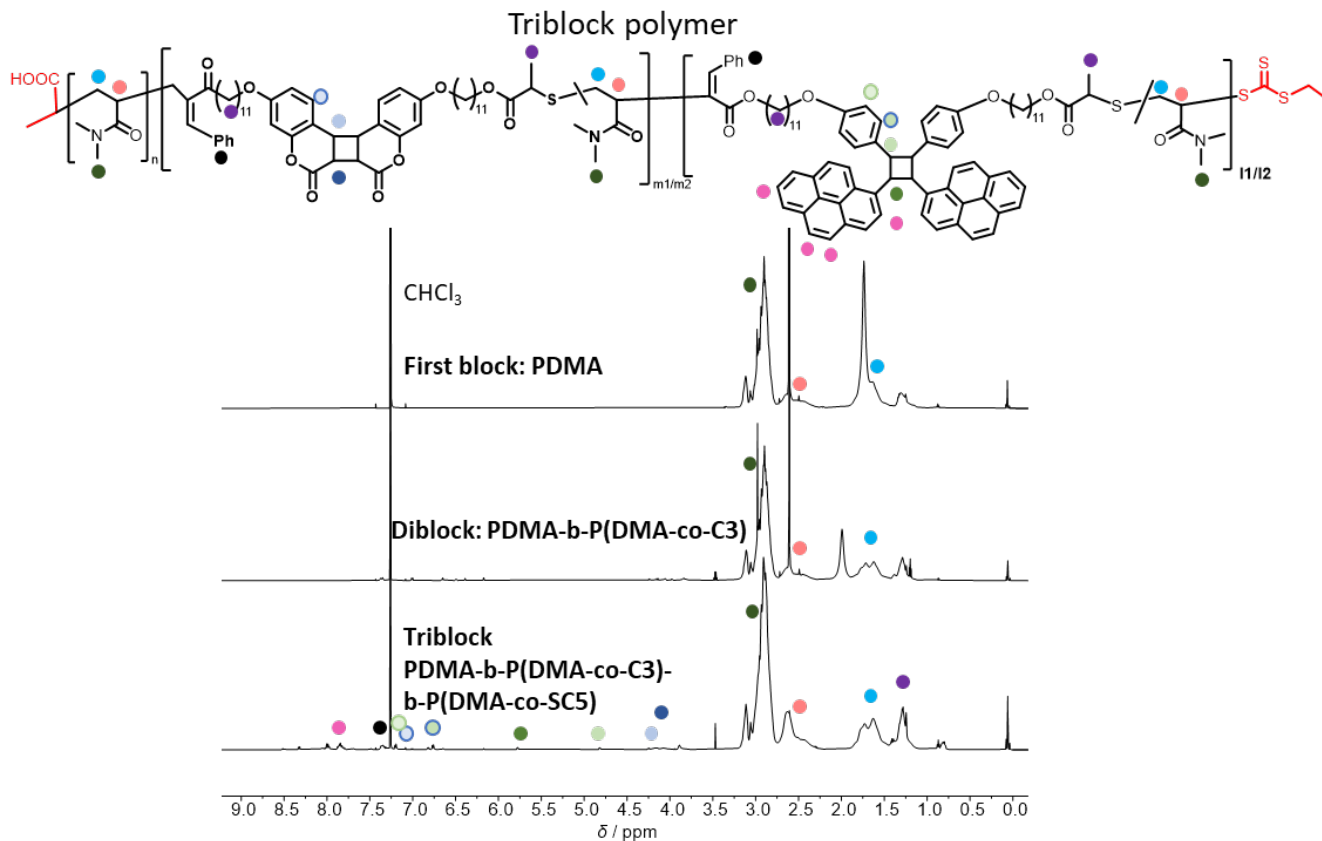

Figure S 7. Stacked <sup>1</sup>H NMR spectra of homopolymer PDMA, diblock polymer **P2** (PDMA-b-P(DMA-co-C3)) and triblock polymer **P3** (PDMA-b-P(DMA-co-C3)-b-P(DMA-co-SC5)) in CDCl<sub>3</sub> (See Fig. 4A for a zoom into the region between  $\delta$  = 8.8 – 3.6 ppm).

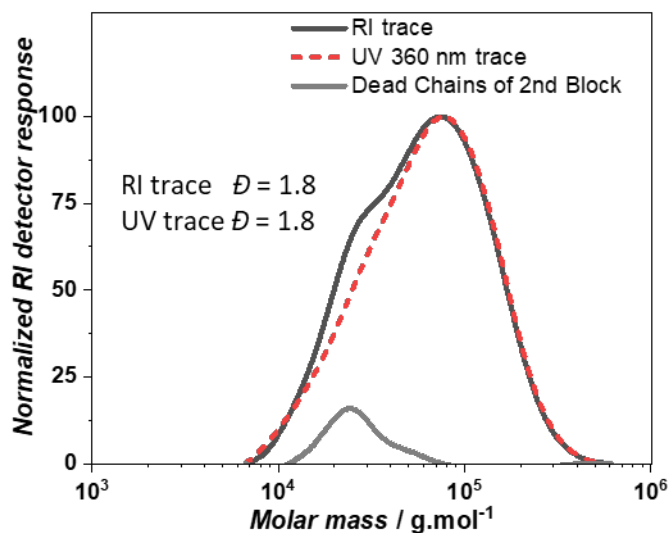

|                                           | peak area          |
|-------------------------------------------|--------------------|
| RI trace                                  | $1.62 \times 10^7$ |
| Dead chains of second block               | $0.07 \times 10^7$ |
| <b>Ratio of dead chain to triblock P3</b> | <b>&lt; 5%</b>     |

Figure S 8. Left: Overlay of RI trace and UV ( $\lambda$  = 360 nm) trace in SEC measurement of **P3** and distribution of dead chains of second block obtained from subtraction of RI trace to UV ( $\lambda$  = 360 nm) trace. Right: the peak area integrated from respective peaks. The amount of dead chain of second block to chain extension product- triblock P3 is calculated from peak area of dead chain peak and UV trace peak.

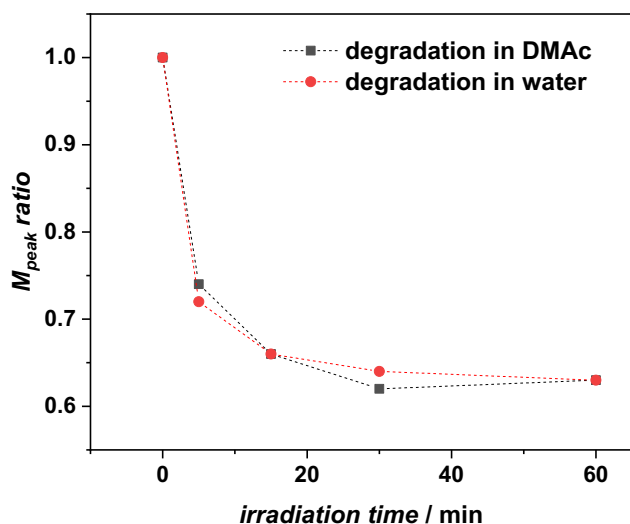

Figure S 9. Comparison of photodegradation of diblock polymer **P2** in DMAc solvent and in water: reduction of averaged molecular weight ( $M_n$ ) of polymer represented by ratio of  $M_p$  of polymer at  $t$  min UVB irradiation to  $M_n$  of pristine polymer plotted vs UVB irradiation time.

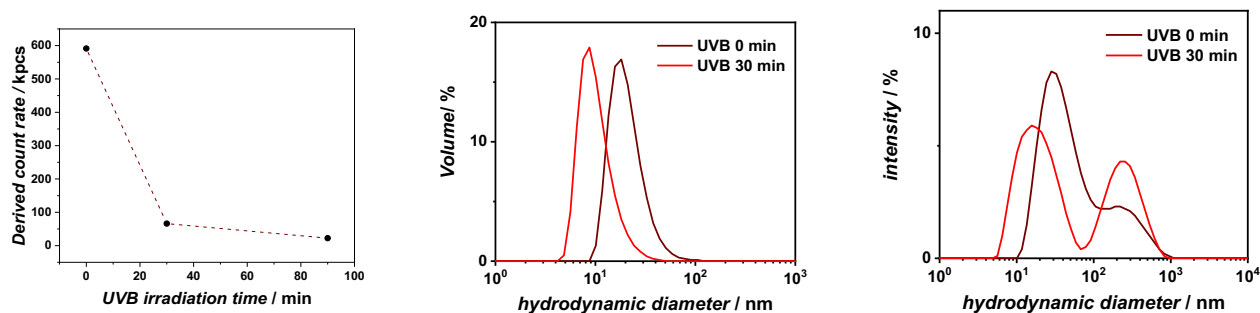

Figure S 10. A dispersion of diblock copolymer **P2** in water ( $1.5 \text{ mg mL}^{-1}$ ) was irradiated with UVB for 90 min. Derived count rate of dispersion plotted vs UVB irradiation time (left), hydrodynamic diameter distribution by volume of the dispersion at UVB irradiation time 0 min, 30 min (middle), and hydrodynamic diameter distribution by intensity of the dispersion at UVB irradiation time 0 min, 30 min (right).

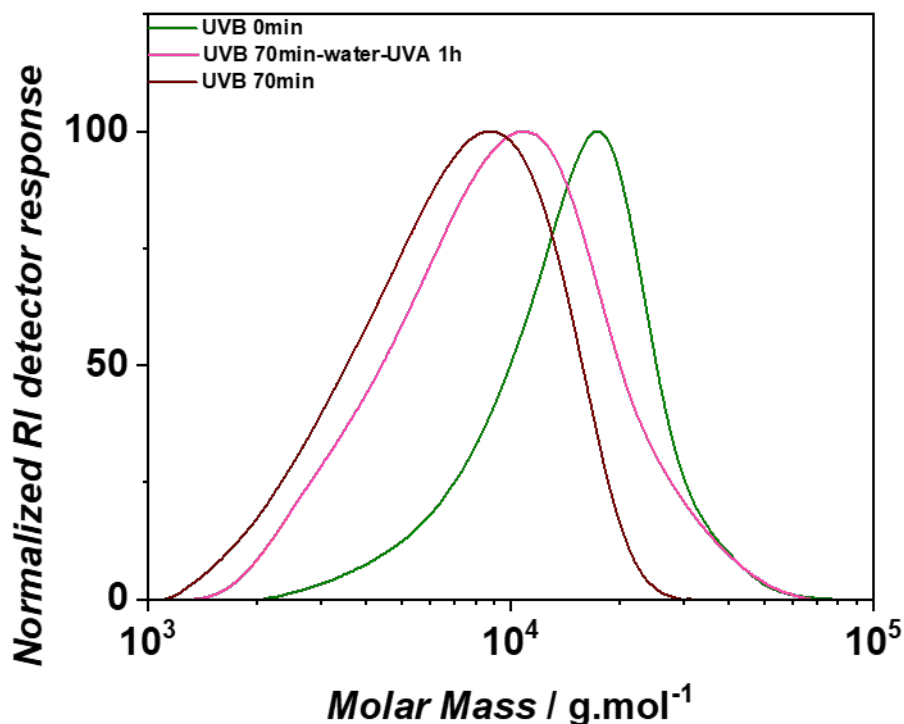

|                               | UVB 0min | UVB 70 min | UVB 70min-water-UVA 1h |
|-------------------------------|----------|------------|------------------------|
| $M_n$ (kg.mol <sup>-1</sup> ) | 12.5     | 5.7        | 7.5                    |
| $M_p$ (kg.mol <sup>-1</sup> ) | 17.2     | 8.2        | 10.5                   |
| $\bar{D}$                     | 1.32     | 1.41       | 1.54                   |

Figure S 11. SEC traces and respective molar weight and dispersity during the depolymerization and repolymerization of a copolymer P(DMA-co-C3) ( $M_n$  12.5 kg.mol<sup>-1</sup>,  $\bar{D}$  1.3, incorporation ratio 1.4%). Refer to section 2 for detailed experiment.

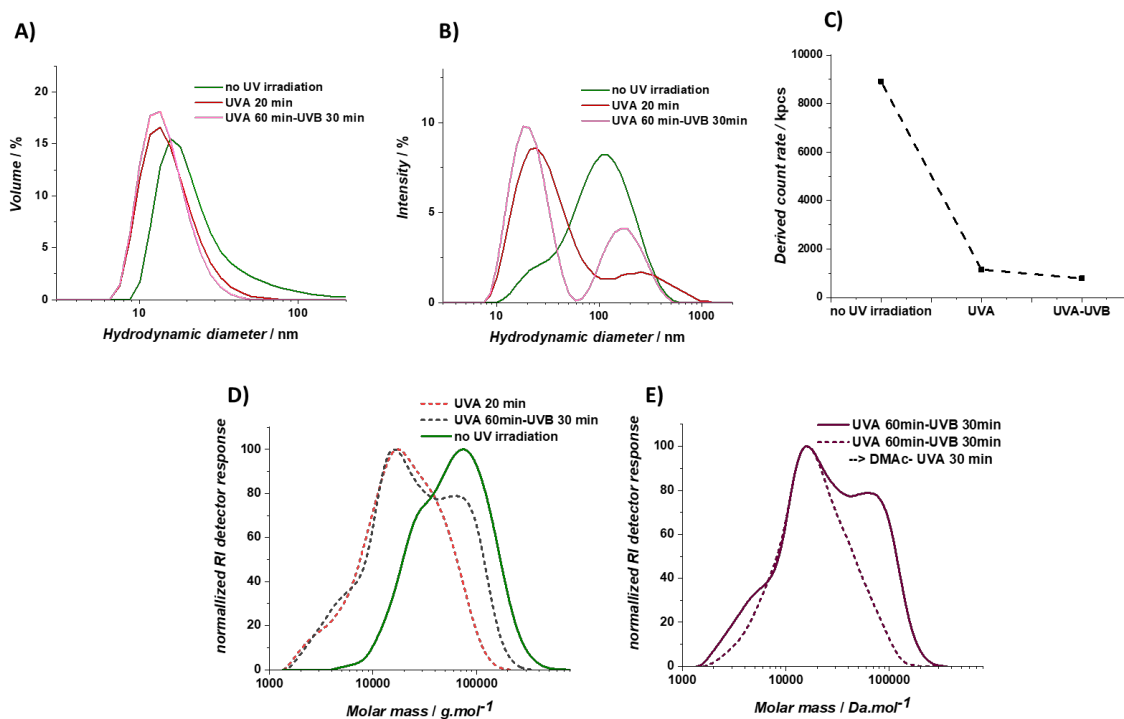

Figure S 12. Degradation of **P3** in water (2 mg.mL<sup>-1</sup>) under UV irradiation: A) Hydrodynamic diameter distribution by volume of the dispersion with UVA and UVB irradiation obtained via DLS; B) Hydrodynamic diameter distribution by intensity of the dispersion with UVA and UVB irradiation obtained via DLS; C) Derived count rate of dispersion plotted vs UV irradiation; D) overlay SEC of **P3**, **P3** dispersion irradiated with UVA 20 min, and UVA 60 min- UVB 30 min ; E) Overlay SEC traces of the polymer obtained from UVA- UVB irradiation of **P3** dispersion in water and 30-min UVA irradiation of its solution in DMAc.

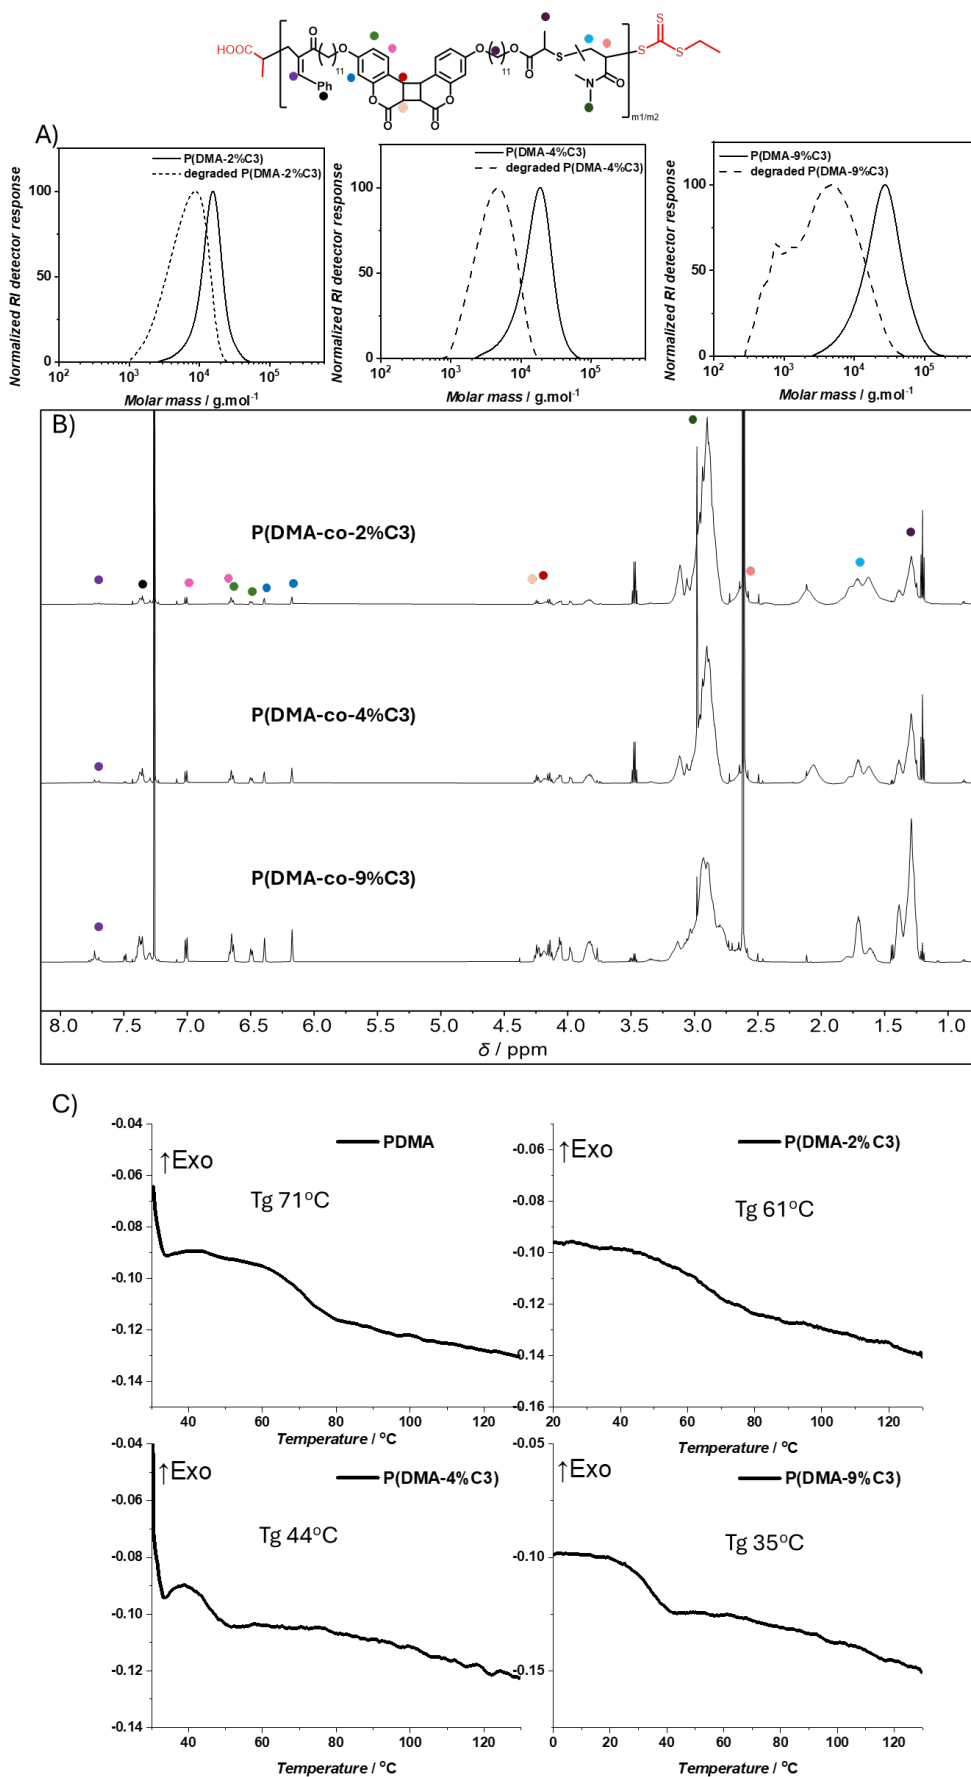

Figure S 13. Copolymers of DMA and **C3** prepared at different molar ratios: (A) SEC chromatograms of the copolymers and the copolymers irradiated with UVB for 30min: P(DMA-2%C3)  $M_n = 13 \text{ kg mol}^{-1}$ ,  $\bar{D} = 1.2$ , degraded polymer  $M_n = 5.3 \text{ kg mol}^{-1}$ ; P(DMA-4%C3)  $M_n = 14 \text{ kg mol}^{-1}$ ,  $\bar{D} = 1.3$ , degraded polymer  $M_n = 3.5 \text{ kg mol}^{-1}$ ; P(DMA-9%C3)  $M_n = 20 \text{ kg mol}^{-1}$ ,  $\bar{D} = 1.5$ , degraded polymer  $M_n = 1.9 \text{ kg mol}^{-1}$ ; (B) <sup>1</sup>H NMR acquired in CDCl<sub>3</sub>; (C) DSC measurement of copolymers from (A) and pure PDMA  $M_n = 19 \text{ kg mol}^{-1}$ .

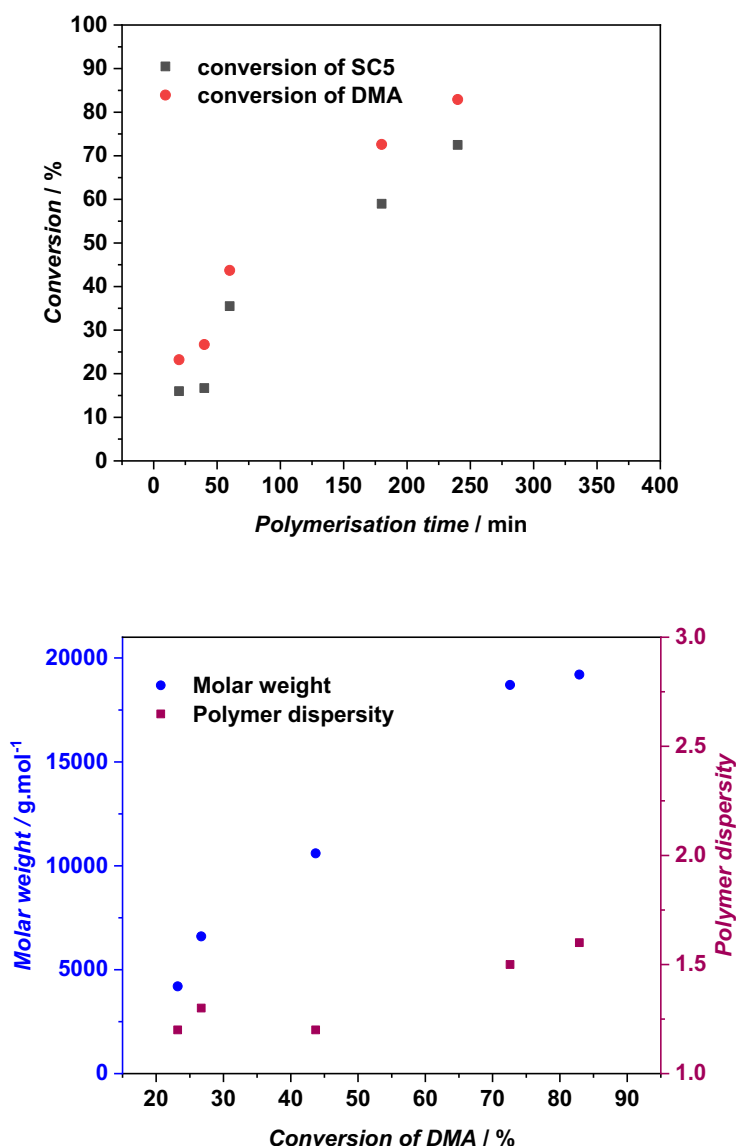

Figure S 14. Plot of *SC5* and DMA conversion vs polymerisation time (top) and polymer molecular weight and polymer dispersity plotted vs DMA conversion (bottom). Refer to section 6.4 for detailed calculations.

## 2. Experimental details

### *SEC-ESI-MS*

Size exclusion chromatography coupled with electrospray ionisation mass spectrometry experiments were measured using a Q Exactive Plus Biopharma mass spectrometer (Thermo Fisher Scientific, San Jose, CA, USA) equipped with a HESI-II ionisation source. The mass spectrometer was calibrated up to  $m/z$  2000 using premixed calibration solution (Pierce; Thermo Scientific) and for high mass mode ( $m/z$  600-8000) using ammonium hexafluorophosphate solution. A constant spray voltage of +3.5 kV, a dimensionless sheath gas and a dimensionless auxiliary gas flow rate of 10 and 0 were applied, respectively. The capillary temperature was set to 320 °C, the S-lens RF level was set to 150 and the auxiliary gas heater temperature was set to 125 °C. The Q Exactive was coupled to an UltiMate 3000 UHPLC System (Dionex, Sunnyvale, CA, USA) consisting of a pump (LPG 3400SD), autosampler (WPS 3000TSL), and a temperature-controlled column department (TCC 3000).

Separation was performed on two mixed bed size exclusion chromatography columns (Agilent, Mesopore 250 × 4.6 mm, particle diameter 3 μm) with a precolumn (Mesopore 50 × 7.5 mm) operating at 30 °C. THF at a flow rate of 0.30 mL min<sup>-1</sup> was used as eluent. The mass spectrometer was coupled to the column in parallel with an UV-detector (VWD 3400, Dionex) and a Refractive Index detector (RefractoMax520, ERC, Japan) as described earlier.<sup>1</sup> A split flow of 0.27 mL min<sup>-1</sup> of the eluent were directed through the UV- and RI-detector and the remaining 30 μL min<sup>-1</sup> directed into the electrospray source following post-column addition of 50 μM sodium iodide in methanol at 20 μL min<sup>-1</sup> by a micro-flow HPLC syringe pump (Teledyne ISCO, Model 100DM). A 100 μL aliquot of polymer solution at 2 mg mL<sup>-1</sup> concentration was injected into the SEC system for analysis.

### ***ESI-HRMS***

The working solution was prepared from stock solution of analyte sample 0.05 mg mL<sup>-1</sup> and methanolic solution of sodium acetate 0.2mM with the volume ratio of 10:2. The working solution was then infused directly to the MS system at constant flow rate of 5 μL min<sup>-1</sup> via a 500 μL syringe controlled by a syringe pump (Pump 11 Elite, Harvard Apparatus). Spectra were recorded on the same Q Exactive Plus Biopharma mass spectrometer as described above for the SEC-ESI-MS experiments, operating in positive ion mode. A constant spray voltage of 3.0 kV, a dimensionless sheath gas and a dimensionless auxiliary gas flow rate of 25 and 10 were applied, respectively. The capillary temperature was set to 320 °C, the S-lens RF level was set to 60, and the auxiliary gas heater temperature was set to 100 °C.

### ***THF-SEC***

The SEC measurements were conducted on a PSS SECurity<sup>2</sup> system consisting of a PSS SECurity Degasser, PSS SECurity TCC6000 Column Oven (35 °C), PSS SDV Column Set (8 x 150 mm 5 μm Precolumn, 8 x 300 mm 5 μm Analytical Columns, 100000 Å, 1000 Å and 100 Å) and an Agilent 1260 Infinity Isocratic Pump, Agilent 1260 Infinity Standard Autosampler, Agilent 1260 Infinity Diode Array and Multiple Wavelength Detector (A: 254 nm, B: 360 nm), Agilent 1260 Infinity Refractive Index Detector (35 °C). HPLC grade THF, stabilized with BHT, is used as eluent at a flow rate of 1 mL·min<sup>-1</sup>. Narrow disperse linear poly (methyl methacrylate) ( $M_n$  : 202 g·mol<sup>-1</sup> to 2.2x10<sup>6</sup> g·mol<sup>-1</sup>) standards (PSS ReadyCal) were used as calibrants. All samples were passed over 0.22 μm PTFE membrane filters. Molecular weight and dispersity analysis was performed in PSS WinGPC UniChrom software (version 8.2).

### ***DMAc-SEC***

SEC measurements were conducted on a PSS SECurity<sup>2</sup> system consisting of a PSS SECurity Degasser, PSS SECurity TCC6000 Column Oven (60 °C), PSS GRAM Column Set (8x150 mm 10 μm Precolumn, 8x300 mm 10 μm Analytical Columns, 1000 Å, 1000 Å and 30 Å) and an Agilent 1260 Infinity Isocratic Pump, Agilent 1260 Infinity Standard Autosampler, Agilent 1260 Infinity Diode Array and Multiple Wavelength Detector (A: 254 nm, B: 360 nm), Agilent 1260 Infinity Refractive Index Detector (35 °C). HPLC grade DMAc, 0.01 M LiBr, is used as eluent at a flow rate of 1 mLmin<sup>-1</sup>. Narrow disperse linear poly(styrene) (Mn: 266 g·mol<sup>-1</sup> to 2.52x10<sup>6</sup> g·mol<sup>-1</sup>) and poly(methyl methacrylate) (Mn: 202 g·mol<sup>-1</sup> to 2.2x10<sup>6</sup> g·mol<sup>-1</sup>) standards (PSS ReadyCal) were used as calibrants. All samples were passed over 0.22 μm PTFE membrane filters. Molecular weight and dispersity analysis was performed in PSS WinGPC UniChrom software (version 8.2).

### ***NMR Measurements***

<sup>1</sup>H- and COSY spectra were recorded on a Bruker System 600 Ascend LH, equipped with a BBO-Probe (5 mm) with z-gradient (1H: 600.13 MHz, 13C: 150.90 MHz). All measurements were carried out in deuterated solvents. The chemical shift ( $\delta$ ) is recorded in parts per million (ppm) and relative to the residual solvent protons.<sup>2</sup> The measured coupling constants were calculated in Hertz (Hz). To analyze the spectra the software MESTRENOVA 11.0 was used. The signals were quoted as follows: s = singlet, bs = broad singlet, d = doublet, t = triplet, dd = doublet of doublets and m = multiplet.

Diffusion Ordered Spectroscopy (DOSY) NMR experiments based on 1H-NMR were performed at 35°C on a Bruker 400 Advance III HD spectrometer equipped with either BBO or Quattro Nucleus Probes (QNP) (5mm) with z-gradients (1H: 400.16 MHz). A sequence with longitudinal eddy current delay (LED) using bipolar gradients (Bruker ledbpgp2s) was employed in order to compensate for eddy currents. The diffusion gradient length  $\delta$  and diffusion delay  $\Delta$  were determined separately for each sample. Gradient strength was linearly incremented from 2% at 0.96 Gcm<sup>-1</sup> to 95% at 45.7 Gcm<sup>-1</sup> in 20 steps. The obtained data was processed with TopSpin 4.0.6 and Dynamics Center 2.5.3. After Fourier transformation of the 1D spectra, the signal decay with respect to gradient strength G was fitted to:

$$f(G) = I_0 e^{-DG^2\gamma^2\delta^2\left(\Delta-\frac{\delta}{3}\right)} \cdot 10^4$$

with  $\gamma$  = gyromagnetic ratio of 1

H and I<sub>0</sub> = full signal intensity.

### ***UV-VIS Spectroscopy***

UV/vis spectra were recorded on a Shimadzu UV-2700 spectrophotometer equipped with a CPS-100 electronic temperature control cell positioner. Samples were prepared in THF and measured in Hellma Analytics quartz high precision cells with a path length of 10 mm at ambient temperature.

### ***Dynamic Light Scattering Measurements***

All dynamic light scattering (DLS) measurements were performed using a Malvern Zetasizer Nano-ZS instrument (Malvern Instruments) equipped with a backscattering detector (measurement angle = 175°).

### ***Differential Scanning Calorimetry Measurement***

DSC measurements were conducted using a Netzsch DSC 204 F1 Phoenix. Samples were dissolved in dichloromethane and dropped cast into DSC pans, followed by drying at 40 °C at high vacuum overnight prior to DSC measurement. 3 cycles of heating/cooling ramps at scanning speed of 5 °C·min<sup>-1</sup> were used over the temperature range from either 30 °C or -10 °C to 130 °C with isothermal exposures (10 min) at end temperatures. A nitrogen sample purge flow of 20 mL·min<sup>-1</sup> was employed. Glass transition temperatures were determined from the 2nd heating ramp. The data was analysed using the TA Instruments Universal Analysis 2000 software (version 4.2E).

### ***Small-Angle Neutron Scattering Measurements***

Static small-angle neutron scattering (SANS) measurements were obtained on the Bilby instrument,<sup>3,4</sup> in time-of-flight mode with an asymmetric detector array at the Australian Centre for Neutron Scattering (ACNS),

ANSTO, Lucas Heights, NSW. A neutron wavelength of 4–14 Å was used in these measurements, obtaining a q-range of 0.0017–0.820 Å<sup>-1</sup> at a single instrument configuration. Distance to main detector, rear detector, horizontal curtains, and vertical curtains was 12m, 2m and 1m, respectively. Left, right, top, and bottom curtains separations from the beam were 0.20, 0.38, 0.10 and 0.25m, respectively. Source and sample aperture diameters were 40.0 and 12.5 mm.

Samples were prepared in 1 mm (limited by available amount of sample) path-length Hellma quartz cells for a bit more than two hours (8000 sec each). Best possible contrast ( $SLD_{\text{polymer}} = 0.9\text{--}1.1$ ) was introduced by using D<sub>2</sub>O ( $SLD = 6.36$ ) as the solvent.

SANS data reduction including placing data on the absolute scale was done using standard Bilby procedures implemented in Mantid.<sup>5</sup>

SANS data was analysed using Primus software from ATSAS package<sup>6</sup> and also fit using Spherical polymer micelle model in SASView 5.0.5 [SasView 5.0.5. <http://www.sasview.org/>].

### ***Degradation in DMAc with UV light***

A quartz cuvette containing a solution of polymer in DMAc solvent (1 mg. mL<sup>-1</sup>) was placed in a Luzchem photoreactor equipped with 3 UV lamps. The cuvette was irradiated with UV light for certain amount of time which is specified in the result section.

### ***Degradation in water with UV light***

#### ***Diblock polymer***

1.5 mg of the polymer was dispersed in 1 mL of water. The dispersion was then filtered with 20 µm pore PTFE filter to remove any dust or unresolved solid fragment. The dispersion was transferred to a quartz cuvette for photodegradation. The irradiation of the cuvette was carried out in a Luzchem photoreactor equipped with 3 UV lamps.

#### ***Triblock polymer***

2 mg of the polymer was dissolved in 100 µL of THF. Subsequently, 900 µL of water was introduced to the solution for micelle formation to occur. The dispersion was then filtered with 20 µm pore PTFE filter and transferred to a quartz cuvette for photodegradation. The irradiation of the cuvette was carried out in a Luzchem photoreactor equipped with 3 UV lamps.

### ***Depolymerization and re-polymerization of a copolymer P(DMA-co-C3)***

#### ***Depolymerization***

A copolymer P(DMA-co-C3) (M<sub>n</sub> 12.5 kg.mol<sup>-1</sup>, Đ 1.3, incorporation ratio 1.4%) obtained from PET RAFT polymerization of DMA and C3 was dissolved in THF solvent to the concentration of 1 mg.mL<sup>-1</sup>. The solution was irradiated with UVB light for 70 min to degrade the polymer via cycloreversion of coumarin cycloadducts embedded in polymer backbone.

#### ***Re-polymerization***



The resulting degraded polymer solution (containing 6 mg of polymer) was concentrated under reduced pressure over night, yielding a viscous liquid. The degraded polymer was dissolved in water to the concentration of 1.5 mg.mL<sup>-1</sup>, followed by irradiation with UVA light.

### 3. Synthesis of coumarin cyclic monomer (C3)

Allylic sulfide cyclic monomer bearing coumarin as end groups was synthesized according to our previous publication<sup>7</sup>.

**HRMS:** [C53H66O10SNa]<sup>+</sup> *m/z*= 917.4269; found: 917.4259,  $\Delta m/z$ = 1.1ppm

**<sup>1</sup>H NMR** (600 MHz, CDCl<sub>3</sub>):

isomer 1:  $\delta$  7.39 (d, *J* = 7.6 Hz, 2H), 7.34 – 7.21 (m, 3H), 7.01 (d, *J* = 8.6 Hz, 2H), 6.65 (d, *J* = 8.6 Hz, 2H), 6.42 (s, 1H), 6.12 (d, *J* = 2.4 Hz, 2H), 5.97 (s, 1H), 5.28 (s, 1H), 4.25 – 3.97 (m, 12H), 3.16 (q, *J* = 7.3 Hz, 1H), 1.76 – 1.60 (m, 4H), 1.46 – 1.14 (m, 35H).

isomer 2:  $\delta$  7.39 (d, *J* = 7.6 Hz, 2H), 7.34 – 7.21 (m, 3H), 6.65 (d, *J* = 8.6 Hz, 2H), 6.49 (d, *J* = 8.2 Hz, 2H), 6.42 (s, 1H), 6.40 (d, *J* = 2.5 Hz, 2H), 5.97 (s, 1H), 5.28 (s, 1H), 3.90 – 3.72 (m, 12H), 3.16 (q, *J* = 7.3 Hz, 1H), 1.76 – 1.60 (m, 4H), 1.46 – 1.14 (m, 35H).

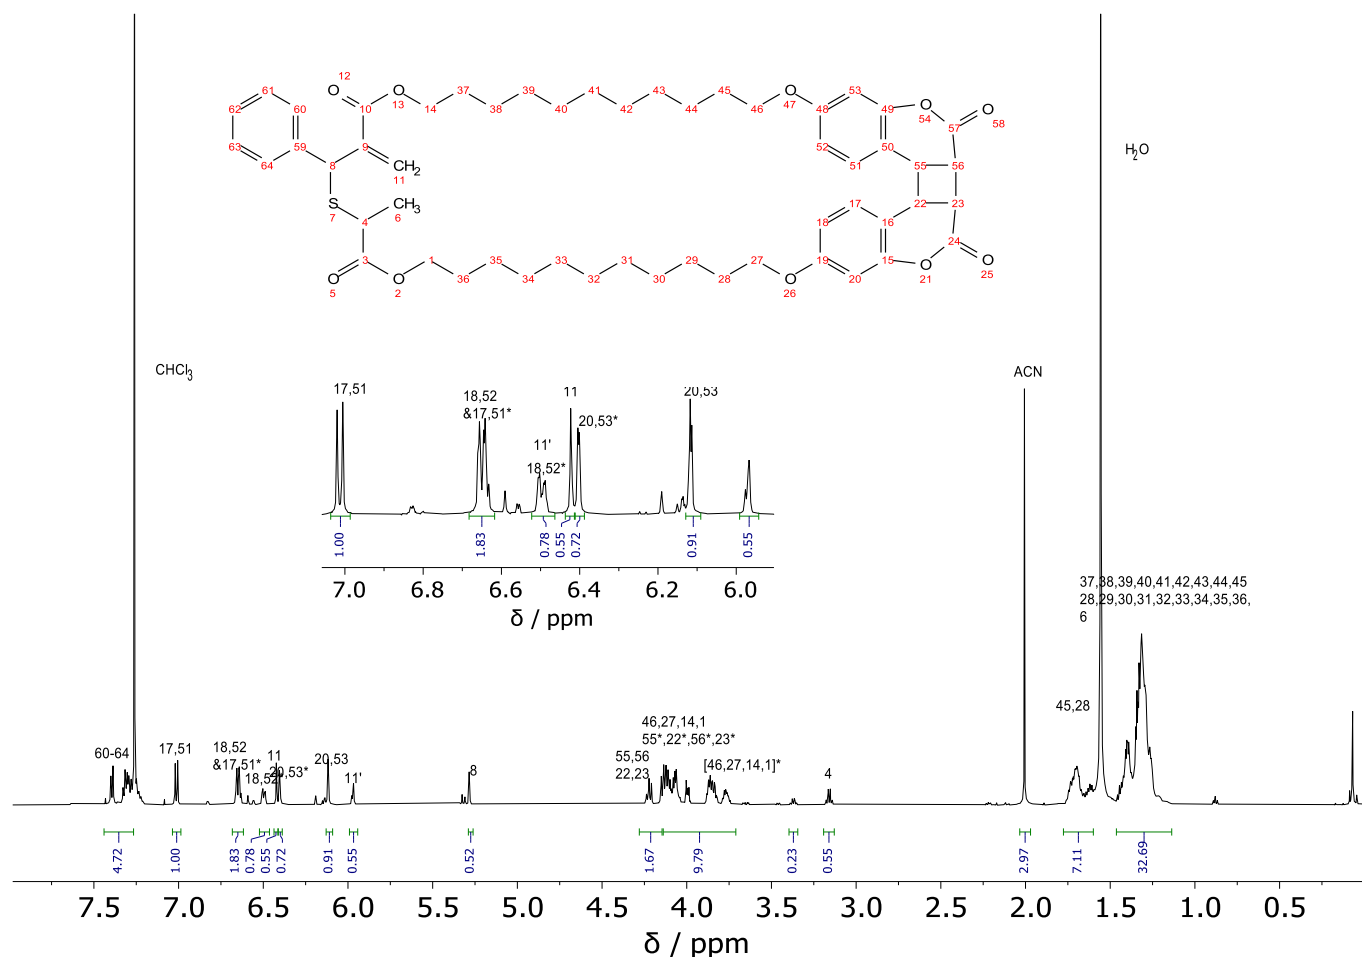

Figure S 15. <sup>1</sup>H NMR spectrum of cyclic monomer C3 acquired in CDCl<sub>3</sub>.

#### 4. Synthesis of styrylpyrene cyclic monomer

##### Materials

Unless stated otherwise, all chemicals and solvents were used as received from the suppliers without further purification.

Benzaldehyde (Sigma- Aldrich, 99.0% min), tert-butyl acrylate (Sigma-Aldrich, 98.0% min), 1,8-Diazabicyclo [5.4.0] undec-7-ene (Sigma- Aldrich, 98.0% min), hydrochloric acid ( 32% in water, Thermo Fisher Scientific), sodium sulfate (anhydrous, granular, Thermo Fisher Scientific, 99.0% min), 4-methoxyphenol (Sigma-Aldrich, 99.0% min), acetic anhydride (Chem-Supply , 99.0% min), N, N-dimethylaminopyridine (Sigma-Aldrich, 99.0%), dichloromethane (Chem-Supply, 99.8%), ethyl acetate (Thermo Fisher Scientific, 99.5%), cyclohexane (Sigma-Aldrich, 99.5%), 1,4-Diazabicyclo [2.2.2] octane (Sigma-Aldrich, 99.0% min), THF (Thermo Fisher Scientific, 99.7%), 2-mercaptopropionic acid (Sigma-Aldrich, 95.0% min), trifluoroacetic acid (Sigma-Aldrich, 99.0% min), acetonitrile (Fisher Scientific, 99.9% min), 4-acetoxystyrene (Acros Organics, 96 %), 1-bromopyrene (Alfa Aesar, 95 %), cyclohexane (Merck, analytical reagent grade), palladium(II) acetate (Merck, 47 % Pd), potassium hydroxide (Thermo Fischer Scientific, Analytical Reagent), hydrochloric acid (Thermo Fisher Scientific, 32 % aqueous solution), toluene (Thermo Fisher Scientific), triethylamine (Sigma-Aldrich > 99%), triphenylphosphine (Chem-supply, 99 %). 11-bromo-1-undecanol (Combi-Blocks, 98.0% min), anhydrous potassium carbonate (Chem-Supply, 99.0% min), potassium iodine (Chem-Supply, 99.0%), acetone (Thermo Fisher Scientific, 99.0% min), oxalyl chloride (Sigma-Aldrich, 98.0% min), dimethylformamide (Thermo Fisher Scientific, 99.8% min), pyridine (Sigma-Aldrich, 99.0% min).

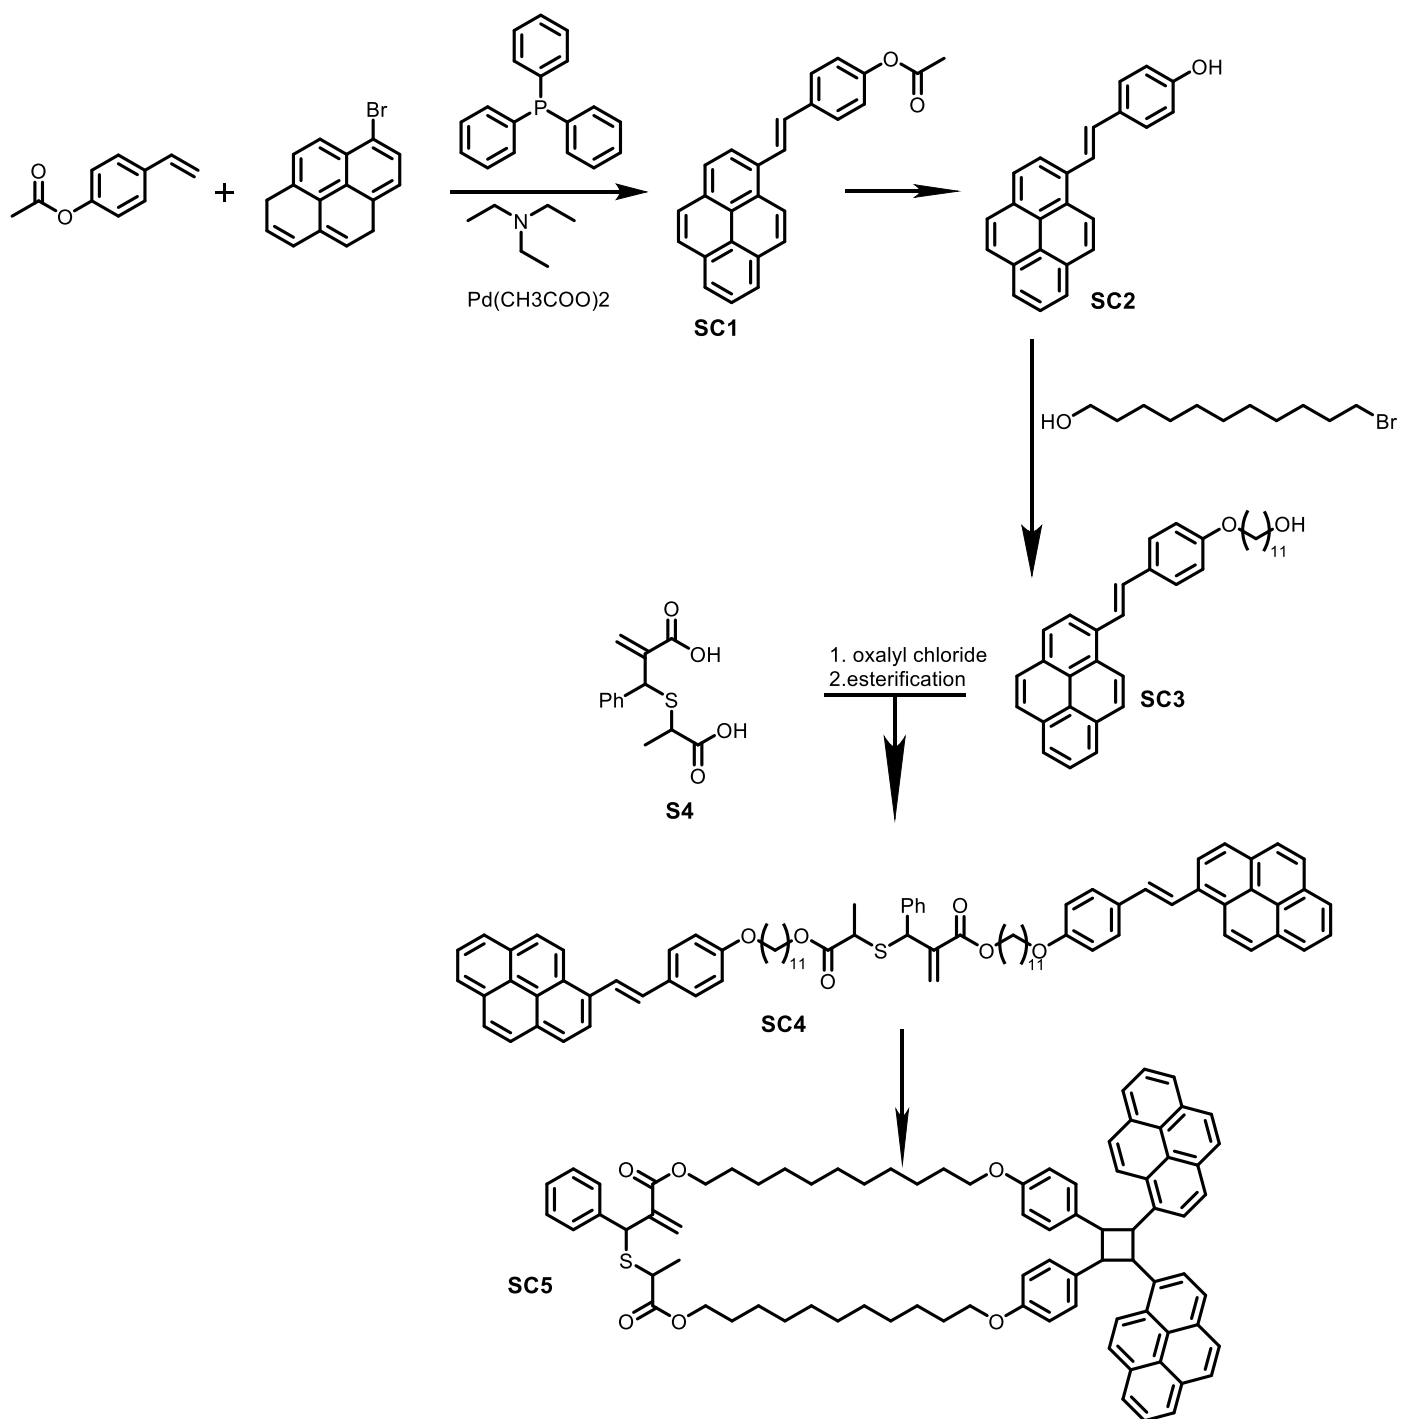

Scheme S 1. Synthesis route for styrylpyrene cyclic monomer **SC5**.

Diacid **S4** was synthesized according to modified procedure adapted from<sup>8</sup>. The details of the synthesis can be found in our previous publication<sup>7</sup>.

Synthesis of **SC1-SC2** was conducted following the literature-known procedure<sup>9</sup>.

#### 4.1. **SC1**

In a brown round-bottom flask, 4-acetoxystyrene (1.3 mL, 8.5 mmol, 1.2 eq), 1-bromopyrene (2.00 g, 7.0 mmol, 1.0 eq), triphenylphosphine (0.18 g, 0.7 mmol, 0.1 eq), triethylamine (9.7 mL, 70 mmol, 10 eq) were dissolved in dimethylformamide (36 mL) with stirring. The flask was degassed with Ar. After 10 minutes, palladium (II) acetate (90 mg, 0.4 mmol, 0.05 eq) was quickly added to the solution with Ar flowing. The mixture was degassed

further for 10 minutes and left stirring at 100°C for 4 days. The reaction mixture was then diluted with 50 mL of toluene and passed through an alumina column, following by washing with HCl 1M (25 mL x 3). After that, the solution was concentrated under reduced pressure and precipitated in cyclohexane to give yellow precipitate **SC1**.

**Yield:** 1.1 g, 3.04 mmol, 43 %

**<sup>1</sup>H NMR** (600 MHz, CDCl<sub>3</sub>) δ 8.48 (d, J = 9.3 Hz, 1H), 8.31 (d, J = 7.9 Hz, 1H), 8.21 – 8.12 (m, 5H), 8.06 (s, 2H), 8.01 (t, J = 7.6 Hz, 1H), 7.70 (d, J = 8.6 Hz, 2H), 7.33 (d, J = 16.0 Hz, 1H), 7.17 (d, J = 8.2 Hz, 2H), 2.34 (s, 3H).

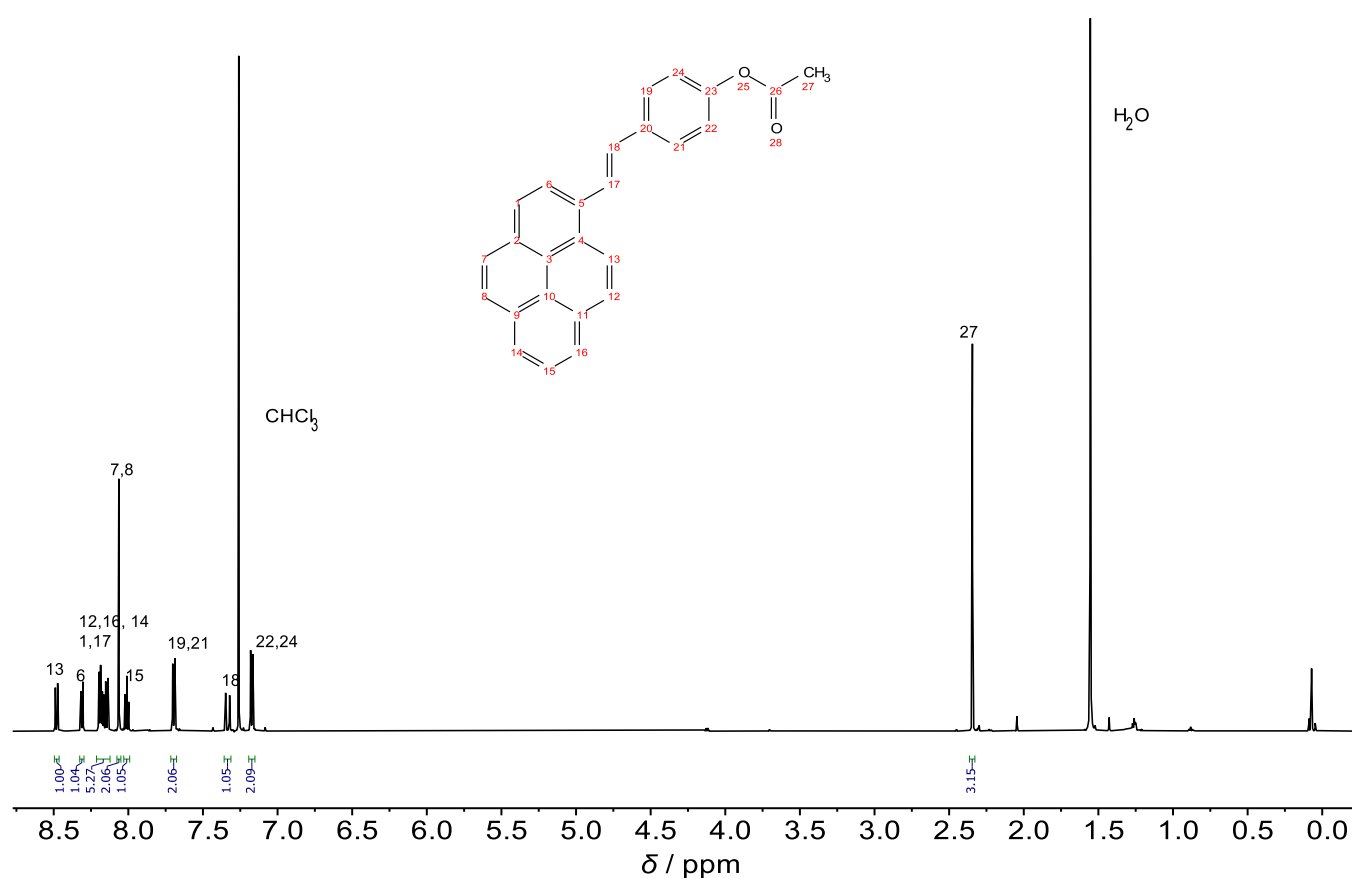

Figure S 16. <sup>1</sup>H NMR spectrum of **SC1** acquired in CDCl<sub>3</sub>.

#### 4.2. **SC2**

Acetoxystyrylpyrene **SC1** (1.1 g, 3.04 mmol, 1 eq) was dissolved in acetonitrile (62 mL) at 70 °C. A basic solution of KOH (1.7 g, 30.4 mmol, 10 eq) and 9 mL miliQ water was added dropwise into the **SC1** solution. The mixture was kept stirring at 70 °C for 16 h. After that, an acidic solution (300 mL of water, 7.7 mL of concentrate HCl) was added to the reaction mixture. The precipitate was collected via centrifugation. **SC2** was obtained in green-yellow solid.

**Yield:** 0.96 g, 3.0 mmol, 98 %.

**HRMS:** [C<sub>24</sub>H<sub>15</sub>O]<sup>-</sup> *m/z*= 319.1128; found *m/z*: 319.1129, Δ*m/z*= 0.3 ppm

$^1\text{H NMR}$  (600 MHz,  $\text{CDCl}_3$ )  $\delta$  8.49 (d,  $J = 9.2$  Hz, 1H), 8.30 (d,  $J = 8.1$  Hz, 1H), 8.17 (m, 3H), 8.13 (d,  $J = 9.2$  Hz, 1H), 8.08 – 8.03 (m, 3H), 8.00 (t,  $J = 7.6$  Hz, 1H), 7.59 (d,  $J = 8.4$  Hz, 2H), 7.30 (d,  $J = 16.0$  Hz, 1H), 6.91 (d,  $J = 8.4$  Hz, 2H), 4.95 (s, 1H).

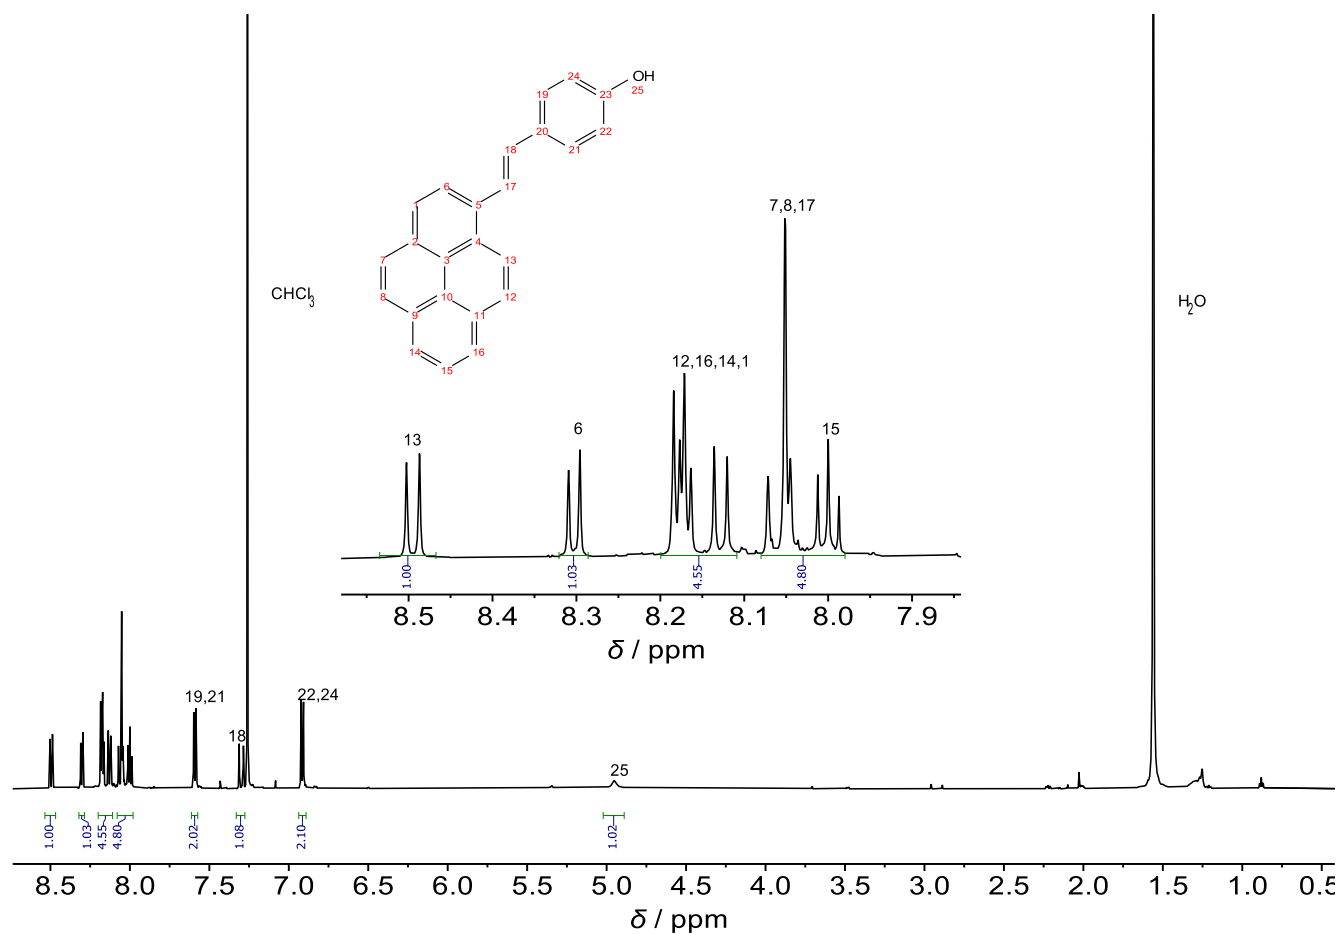

Figure S 17.  $^1\text{H NMR}$  spectrum of **SC2** acquired in  $\text{CDCl}_3$ .

### 4.3. **SC3**

To a round-bottom flask, hydroxystyrylpyrene **SC2** (0.96 g, 3 mmol, 1.0 eq), 11-bromo-1-undecanol (0.75g, 3 mmol, 1.0 eq), anhydrous potassium carbonate (1.38 g, 10 mmol, 3.3 eq), 30 mg potassium iodide, and 75 mL fresh distilled acetone was added. The mixture was refluxed at 61 °C for 72 h. After that, while the mixture was still hot, the solid was filtered off and solvent was removed under reduced pressure. The obtained solid was then dissolved in dichloromethane and washed by HCl 1N. The DCM solvent was then removed to afford a yellow solid **SC3**.

**Yield:** 1.35 g, 2.75 mmol, 91 %.

**HRMS:**  $[\text{C}_{35}\text{H}_{38}\text{O}_2\text{Na}]^+$   $m/z = 513.2765$ , found  $m/z = 513.2767$ ,  $\Delta m/z = 0.4$  ppm

$^1\text{H NMR}$  (600 MHz,  $\text{CDCl}_3$ )  $\delta$  8.50 (d,  $J = 9.3$  Hz, 1H), 8.31 (d,  $J = 8.0$  Hz, 1H), 8.19 – 8.15 (m, 3H), 8.13 (d,  $J = 9.3$  Hz, 1H), 8.08 – 8.04 (m, 3H), 8.00 (t,  $J = 7.6$  Hz, 1H), 7.62 (d,  $J = 8.5$  Hz, 2H), 7.31 (d,  $J = 16.0$  Hz, 1H), 6.97 (d,  $J = 8.5$  Hz, 2H), 4.02 (t,  $J = 6.5$  Hz, 2H), 3.65 (t,  $J = 6.7$  Hz, 2H), 1.86 – 1.78 (m, 2H), 1.52 – 1.23 (m, 16H).

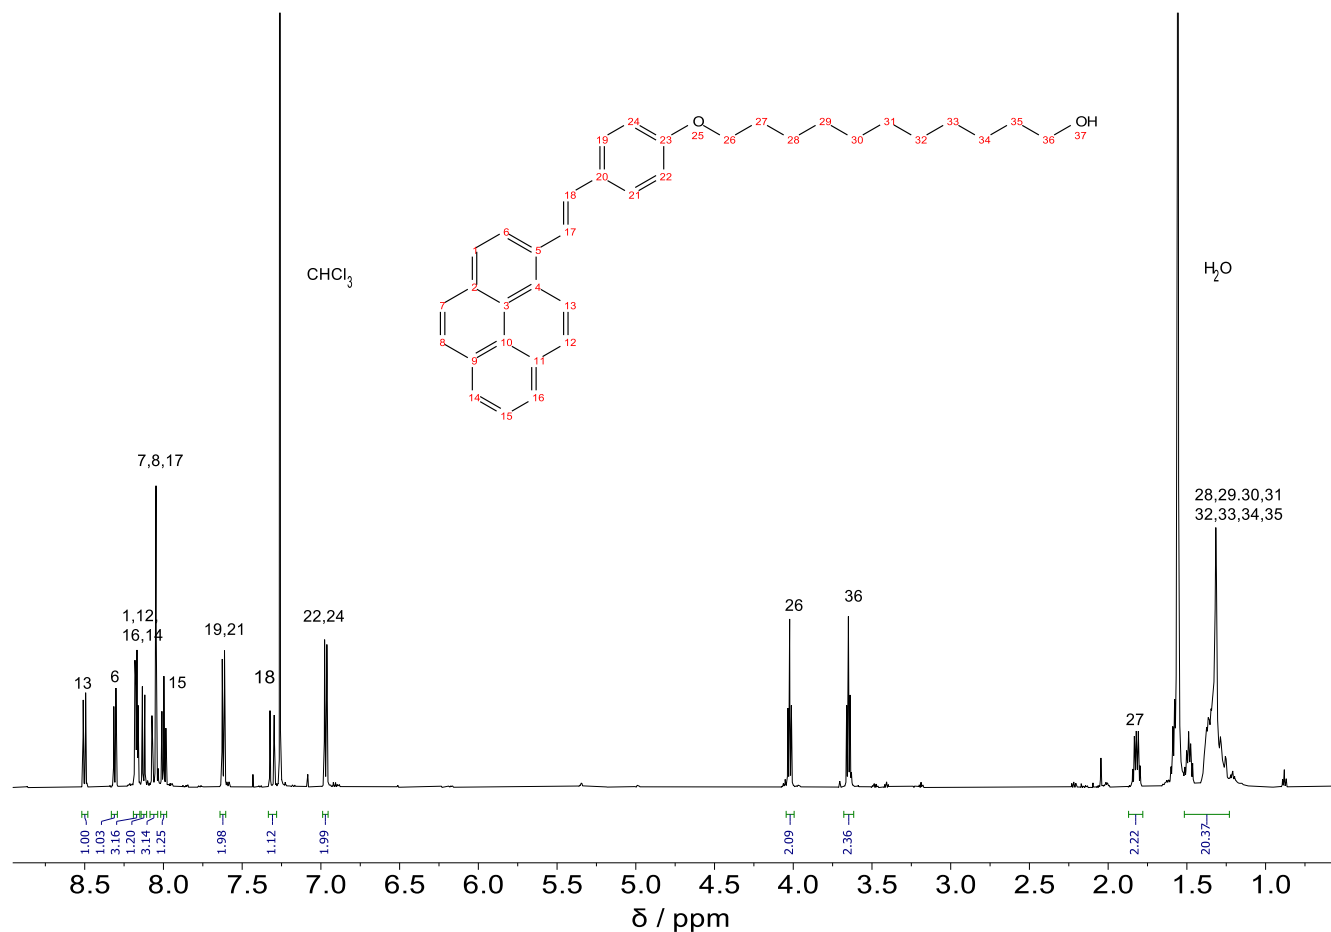

Figure S 18. <sup>1</sup>H NMR spectrum of SC3 acquired in CDCl<sub>3</sub>.

#### 4.4. SC4

Diacid **S4** (184 mg, 0.69 mmol, 1 eq), dry dichloromethane (5 mL), oxalylchloride (0.24 mL, 2.75 mmol, 4 eq) were added in an ice cooled Schlenk line flask that connected to Ar gas. 1 drop of dimethylformamide was added to the flask. The mixture was then kept stirring under Ar for 3h. After that, the reaction mixture was brought to room temperature, and the solvent and excess oxalylchloride were removed by vacuum. To the reaction flask, **SC3** (1.35g, 2.75 mmol, 5 eq), pyridine (0.28 mL, 3.43 mmol, 5 eq), dry THF (50 mL) were added. The mixture was stirred under Ar for 16 h. To completion, the reaction mixture was concentrated under vacuum, followed by dissolving in dichloromethane to extract with HCl 1N (40 mL x3). The organic phase was then concentrated under reduced pressure and purified by a flash column chromatography with cyclohexane/DCM (98%/2% to 0%/100%) as eluent. The obtained solid was the mixture of **SC4** and a small content of **SC3**. Multiple-time precipitation in methanol removed **SC3**, affording yellow solid **SC4**.

**Yield:** 300 mg, 0.25 mmol, 35 %.

**HRMS:** [C<sub>83</sub>H<sub>86</sub>NaO<sub>6</sub>S]<sup>+</sup> *m/z* 1233.6038, found *m/z* 1233.6039, Δ*m/z*= 0.1 ppm

**<sup>1</sup>H NMR** (600 MHz, CDCl<sub>3</sub>) δ 8.48 (d, *J* = 9.2 Hz, 2H), 8.28 (d, *J* = 8.0 Hz, 2H), 8.18 – 8.13 (m, 6H), 8.10 (d, *J* = 9.3 Hz, 2H), 8.06 – 8.01 (m, 6H), 7.98 (t, *J* = 7.8 Hz, 2H), 7.60 (d, *J* = 8.7 Hz, 4H), 7.40 (d, *J* = 7.8 Hz, 2H), 7.35 – 7.21 (m, 5H), 6.95 (d, *J* = 8.3 Hz, 4H), 6.42 (s, 1H), 5.97 (s, 1H), 5.29 (s, 1H), 4.15 – 4.05 (m, 4H), 4.03 – 3.95 (m, 4H), 3.17 (q, *J* = 7.3 Hz, 1H), 1.85 – 1.76 (m, 4H), 1.70 – 1.22 (m, 35H).

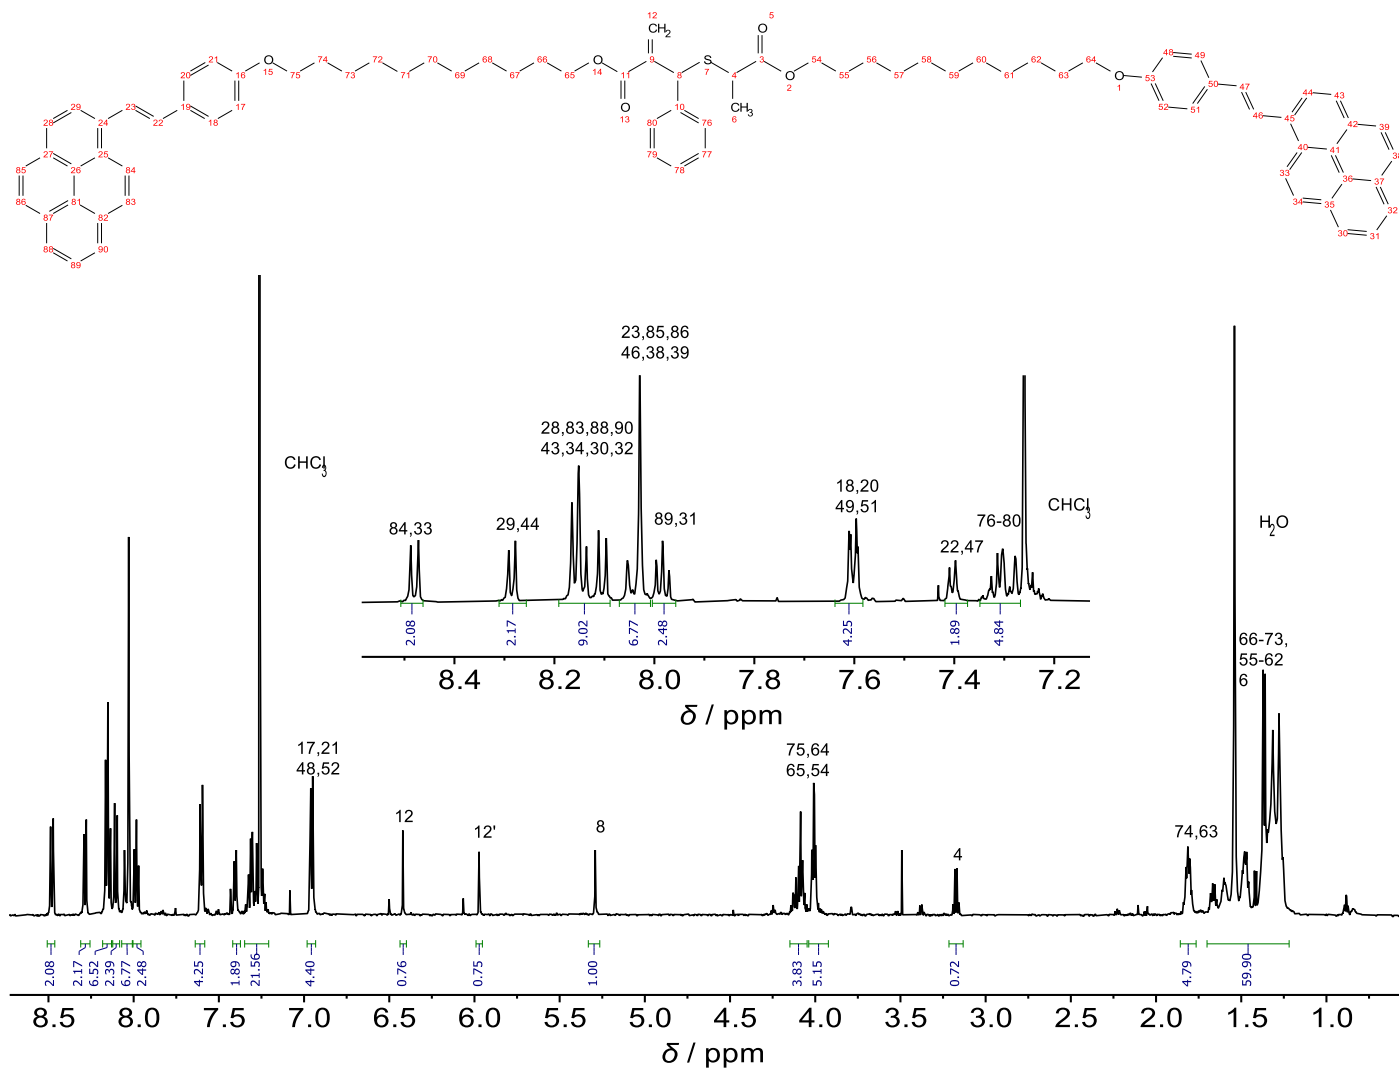

Figure S 19.  $^1\text{H}$  NMR spectrum of **SC4** acquired in  $\text{CDCl}_3$ .

#### 4.5. **SC5**

In order to prevent intermolecular cycloaddition reaction, the cyclisation reaction of linear monomer **SC4** was conducted at dilute concentration. 10 mL solution of **SC4** 0.5 mg/mL in toluene was degassed with Ar for 20 minutes. Then the solution was irradiated with a LED 465 nm (10W, 1.05 A). The reaction was monitored by SEC at isosbestic point of the photo cycloaddition reaction 355 nm. It was found that the reaction completed after 150 min. The reaction mixture was then concentrated under reduced pressure and freeze dried to remove solvent completely, giving **SC5** as a yellow viscous oil.

**Yield:** 5 mg, 100 %.

**HRMS:**  $[\text{C}_{83}\text{H}_{86}\text{NaO}_6\text{S}]^+$   $m/z$  1233.6038, found  $m/z$  1233.6029,  $\Delta m/z = -0.8$  ppm

$^1\text{H}$  NMR (600 MHz,  $\text{CDCl}_3$ )  $\delta$  8.35 (d,  $J = 9.3$  Hz, 2H), 8.11 – 7.97 (m, 8H), 7.93 – 7.80 (m, 8H), 7.43 – 7.23 (m, 5H), 7.21 (d,  $J = 8.4$  Hz, 4H), 6.78 (d,  $J = 8.4$  Hz, 4H), 6.43 (s, 1H), 5.98 (s, 1H), 5.83 – 5.79 (m, 2H), 5.30 (s, 1H), 4.84 – 4.80 (m, 2H), 4.17 – 3.86 (m, 8H), 3.17 (q,  $J = 7.1$  Hz, 1H), 1.82 – 1.13 (m, 39H).

$^1\text{H}, ^1\text{H}$  GCOSY (600MHz / 600 MHz,  $\text{CDCl}_3$ ):  $\delta$   $^1\text{H}$  /  $\delta$   $^1\text{H}$  = 8.51 / 8.28, 8.35 / 7.89, 7.21 / 6.78, 5.81 / 4.82, 4.99 / 4.20.

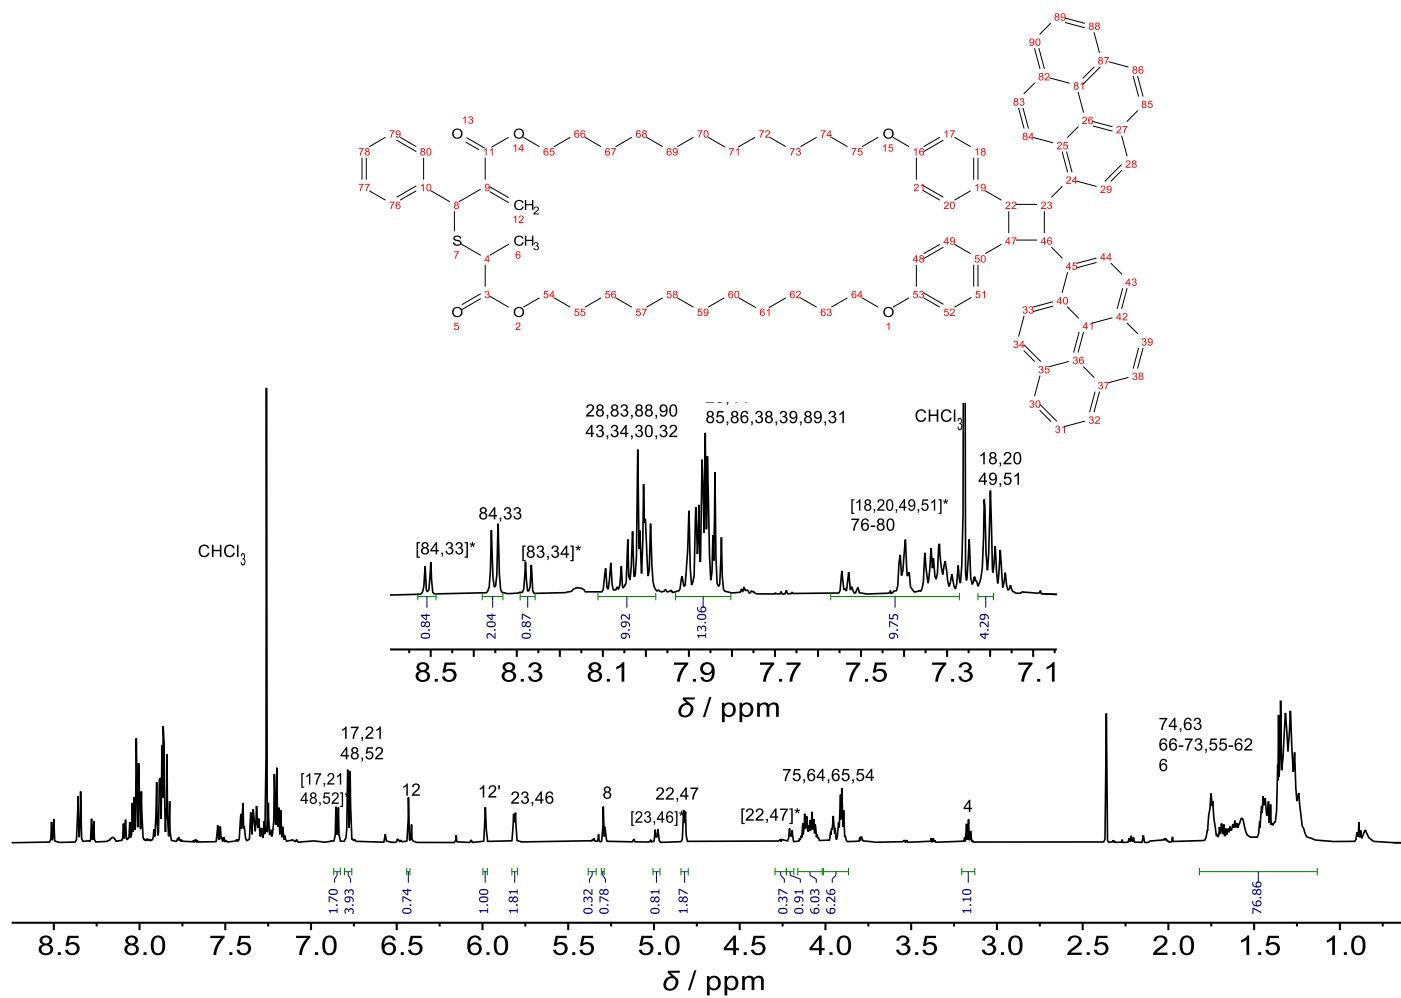



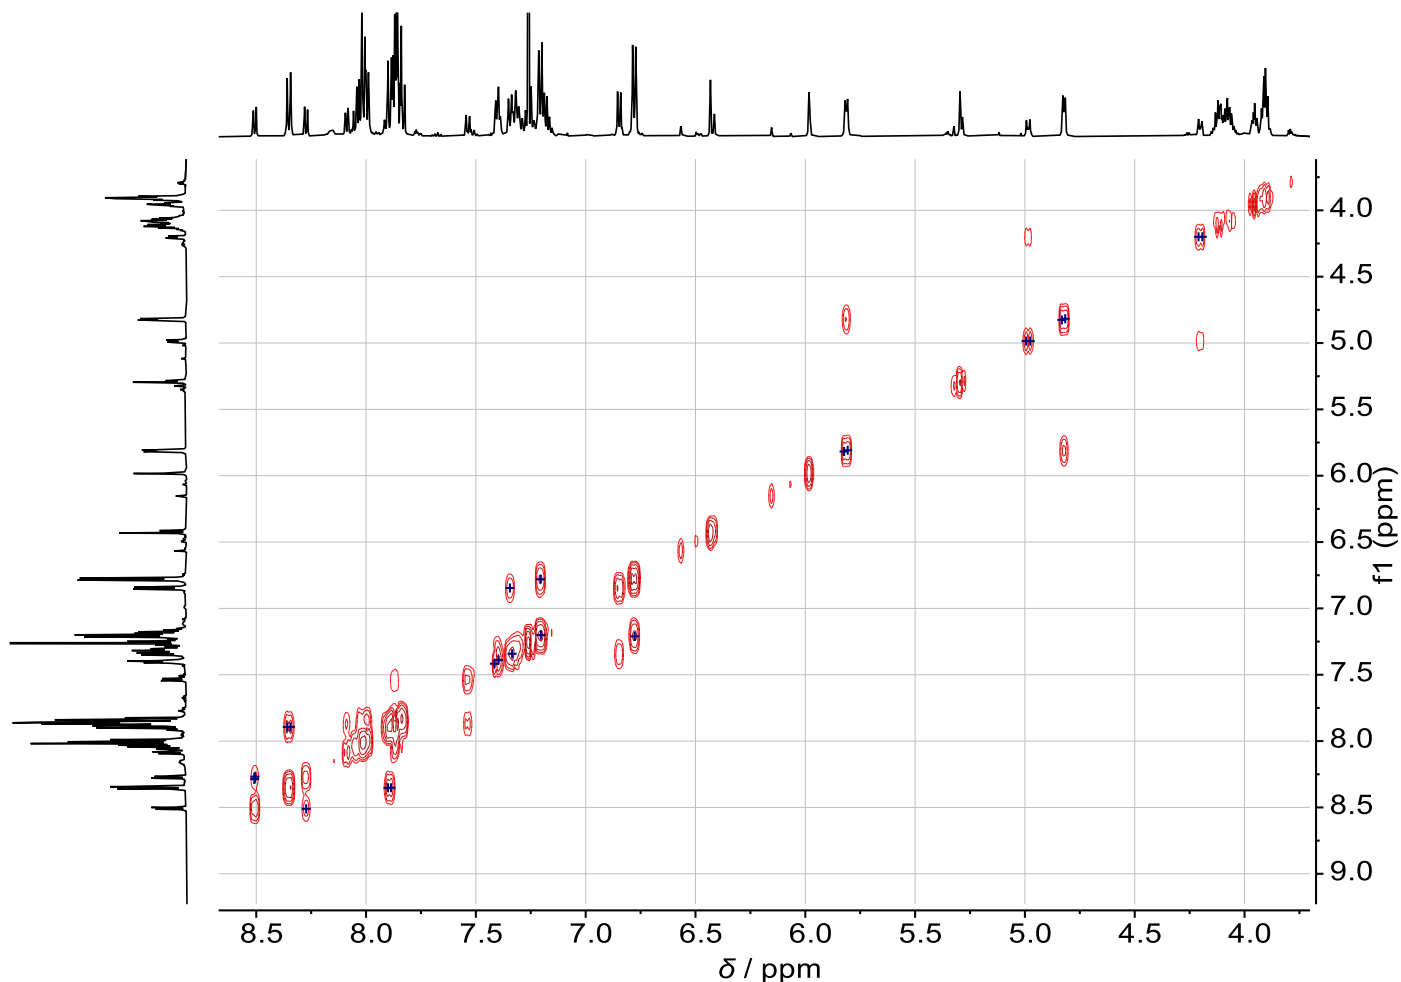

Figure S 21.  $^1\text{H}$ - $^1\text{H}$  COSY of cyclic monomer **SC5** acquired in  $\text{CDCl}_3$ .

## 5. Synthesis of polymer

### Materials

Azobisisobutyronitrile (Sigma-Aldrich-Merck, recrystallized), Zinc acetate (Sigma Aldrich), free base (hTPP) (Sigma Aldrich), DMF (Sigma-Aldrich, > 99 %), DMSO (Sigma-Aldrich, > 99 %), N,N-Dimethylacrylamide (DMA) (Sigma Aldrich, after passing through a short plug of basic alumina), 5,10,15,20-Tetrakis(4-hydroxyphenyl)-21H,23H-porphine zinc (ZnhTPP) (synthesized according to <sup>10</sup>), 2-(((ethylthio)carbonothioyl)thio) propanoic acid (synthesized according to literature<sup>11</sup>).

### 5.1. Synthesis of copolymer of styrylpyrene monomer and DMA

#### Synthesis of copolymer P1

N,N- Dimethylacrylamide (DMA) ( 25.76  $\mu\text{L}$ , 250  $\mu\text{mol}$ , 2500 eq), azobisisobutyronitrile (AIBN) (6.57  $\mu\text{L}$  from stock solution 5 mg/mL in DMF, 0.2  $\mu\text{mol}$ , 2 eq), 2-(((ethylthio)carbonothioyl)thio)propanoic acid (CTA) (11.7  $\mu\text{L}$  from stock solution 15 mg/mL in DMF, 0.5  $\mu\text{mol}$ , 5 eq), cyclic monomer SC5 (6.1 mg, 5  $\mu\text{mol}$ , 50 eq), and DMF (46 mL) were charged to a glass vial. Subsequently, the vial was capped and degassed with Argon gas for 8 minutes. The vial was then heat up at 80  $^{\circ}\text{C}$  for 22 h. To completion, the vial was opened to exposure

to air for quenching polymerisation. The precipitation of reaction mixture with diethyl ether afforded a slight yellow polymer ( $M_n$  20 kg.mol<sup>-1</sup>, Đ 1.6).

A control sample which is the polymerization without cyclic polymer was also carried out, yielding a homopolymer PDMA ( $M_n$  19 kg.mol<sup>-1</sup>, Đ 1.3, Figure S20 below).

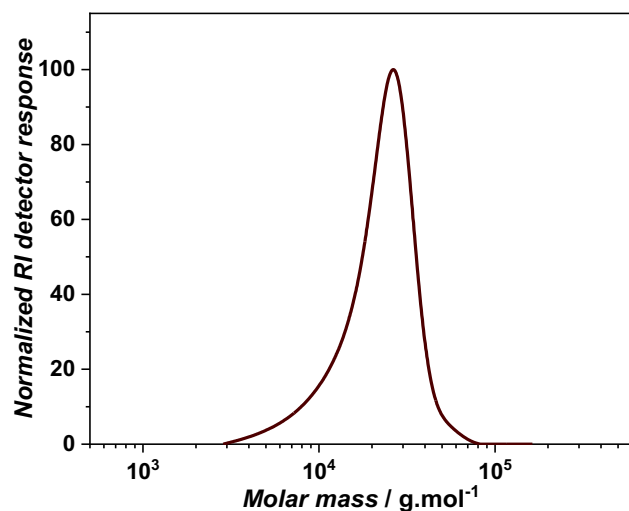

Figure S 22. SEC chromatogram of homopolymer PDMA without styrylpyrene cyclic monomer.

### Kinetic study of copolymerisation of SC5 and DMA

N,N- Dimethylacrylamide (DMA) ( 161.78  $\mu$ L, 1570  $\mu$ mol, 2500 eq), azobisisobutyronitrile (AIBN) (41.25  $\mu$ L from stock solution 5 mg/mL in DMF, 1.256  $\mu$ mol, 2 eq), 2-(((ethylthio)carbonothioyl)thio)propanoic acid (CTA) (73.39  $\mu$ L from stock solution 15 mg/mL in DMF, 3.14  $\mu$ mol, 5 eq), cyclic monomer SC5 (38.0 mg, 31.14  $\mu$ mol, 50 eq), and DMF (288.80 mL) were mixed and divided into equal parts of 80  $\mu$ L in glass vials. Subsequently, these vials were capped and degassed with Argon gas for 8 minutes. The vial was then heated up at 70 °C for different time. To conduct a measurement, the vial was opened to exposure to air for quenching polymerisation.

### 5.2. Synthesis of copolymers and diblock copolymers of coumarin based C3 monomer and DMA

#### Experimental setup

The polymerization setup adapted from literature<sup>10</sup> was illustrated in Figure S21 below. Briefly, in a photobox, the well plate of polymerization solution was placed on the top of the LED plate ( $\lambda_{max}$  = 572 nm) as the light source to catalyse the polymerization. The LED plate with the heat sink attached was put in contact with a metal surface (e.g. a heat plate without heating activation) to facilitate heat transfer during polymerization process, preventing overheating the LED plate and well plate. A fan was used to assist the heat reduction of the polymerization system. The LED plate was connected to a power supply which can be tailored to desired current and voltage. The current used in experiment was 0.05A/row of 8 LED bulbs. The polymerization time can be set up by a timer which connects power supply with the electricity power.

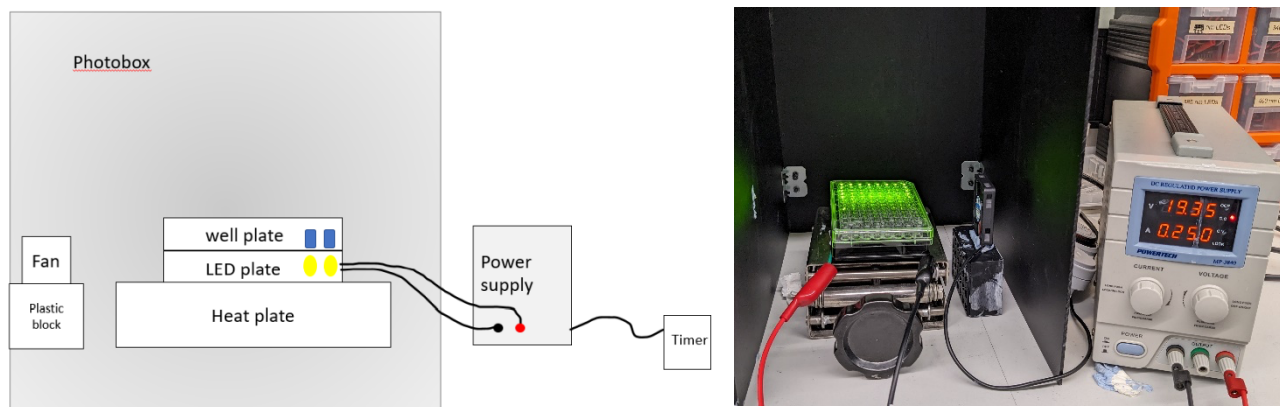

Figure S 23. Illustrative representation of experimental setup of PET-RAFT polymerisation experiment (left) and picture of actual setup (right)

### Copolymer synthesis

Dimethyl acrylamide (DMA) monomer (5.2  $\mu\text{L}$ , 50.4  $\mu\text{mol}$ , 150 eq), ZnhTPP (3.36  $\mu\text{L}$  of 0.01M in DMSO solution, 0.034  $\mu\text{mol}$ , 0.1 eq), 2-(((ethylthio)carbonothioyl) thio) propanoic acid (13.3  $\mu\text{L}$  of 5.3 mg/mL in DMSO solution, 0.34  $\mu\text{mol}$ , 1 eq) were added in a well in the well plate. Cyclic monomer C3 (100 mg/mL DMSO) were added in the well to pre-determined feed ratio. After that DMSO was added to the total volume of polymerisation mixture of 100  $\mu\text{L}$ . The polymerization solution was irradiated with an LED plate for 20h. The polymer product was precipitated out of dimethyl ether, and dried under reduced pressure.

### Block copolymer synthesis

Dimethyl acrylamide (DMA) monomer (5.2  $\mu\text{L}$ , 50.4  $\mu\text{mol}$ , 100 eq), ZnhTPP (1.51  $\mu\text{L}$  of 0.01M in DMSO solution, 0.015  $\mu\text{mol}$ , 0.03 eq), 2-(((ethylthio)carbonothioyl) thio) propanoic acid (20.0  $\mu\text{L}$  of 5.3 mg/mL in DMSO solution, 0.5  $\mu\text{mol}$ , 1 eq) and DMSO (73.3  $\mu\text{L}$ ) were added in a well in the well plate. Total volume of polymerisation mixture was 100  $\mu\text{L}$ . The polymerization solution was irradiated with an LED plate for 20h.

After that, 10  $\mu\text{L}$  of the polymerization was taken out for SEC measurement. Thus, the remaining amount of CTA (PDMA with RAFT end group) and ZnhTPP in the well plate was 90% of the initial CTA and ZnhTPP amount before beginning the first block polymerization. The fresh DMA monomer (2.34  $\mu\text{L}$ , 22.7  $\mu\text{mol}$ ) was then added to the desired ratio of  $[\text{DMA}]/[\text{CTA}]=50$ . Fresh ZnhTPP (1.51  $\mu\text{L}$  of 0.01M in DMSO solution, 0.015  $\mu\text{mol}$ ) was added to desired ratio of  $[\text{ZnhTPP}]/[\text{CTA}]=6\%$ . Cyclic monomer C3 (8.12  $\mu\text{L}$  of 100 mg/mL in DMSO solution, 0.91  $\mu\text{mol}$ , 2 eq) was finally added to the mixture,  $[\text{C3}]/[\text{CTA}]=2$ . Subsequently, the well plate was submitted to PET RAFT polymerization for 20 h. The polymer was precipitated out of diethyl ether and dried under reduced pressure, giving a slight green polymer ( $M_n$  18.5  $\text{kg}\cdot\text{mol}^{-1}$ ,  $\bar{D}$  1.3).

A control sample which is the polymerization without cyclic polymer and desired ratio of  $[\text{DMA}]/[\text{CTA}]=100$  in second block was also carried out, yielding a homopolymer PDMA ( $M_n$  22  $\text{kg}\cdot\text{mol}^{-1}$ ,  $\bar{D}$  1.2, Figure S22 below).

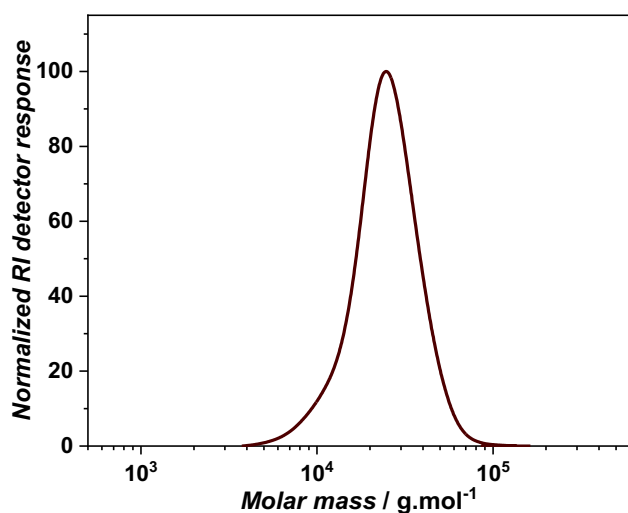

Figure S 24. SEC chromatogram of homopolymer PDMA without coumarin cyclic monomer.

### 5.3. Synthesis of triblock polymer

Diblock polymer containing coumarin dimer in the backbone was synthesized according to the procedure above. The diblock polymer after workup was dried with Nitrogen gas for 1h to remove diethyl ether solvent. After that, the polymer was dissolved with 70  $\mu\text{L}$  DMF in a glass vial. An aliquot of 3  $\mu\text{L}$  of this solution was used to measure SEC. The remaining 67  $\mu\text{L}$  was used as macro-CTA for chain extension with DMA and **SC5** cyclic monomer. With the assumption that all of RAFT agent attended polymerisation reaction to result in polymer with RAFT end group and all polymer was precipitated in diethyl ether, the amount of CTA in this 67  $\mu\text{L}$  solution was 0.43  $\mu\text{mol}$  (5.0 eq). To this solution, DMA (21.9  $\mu\text{L}$ , 213  $\mu\text{mol}$ , 2500.0 eq), AIBN (1.4  $\mu\text{L}$  from stock solution 5 mg/mL in DMF, 0.043  $\mu\text{mol}$ , 0.5 eq), styrylpyrene monomer **SC5** (5.2 mg, 4.3  $\mu\text{mol}$ , 50.0 eq) were added. Subsequently, the vial was capped and degassed with Argon for 8 minutes. The vial was then kept at 80°C for 22 h. After that, the vial was opened to air to stop the polymerisation. The mixture was precipitated with diethyl ether, followed by washing with water to remove unreacted diblock. Finally, the obtained polymer was dried under vacuum, giving a yellow polymer ( $M_n$  40  $\text{kg.mol}^{-1}$ ,  $\bar{D}$  1.9).

## 6. Calculation and estimation

### 6.1. Estimation of copolymer P1

#### a) Estimation of degree of polymerization (DP)

+) Derived from averaged molar weight of polymer:

$$M_n = DP \times M_{\text{monomer}}$$

$$M_{\text{DMA}} = 99 \text{ g.mol}^{-1}, M_{\text{SC5}} = 1212 \text{ g.mol}^{-1}$$

$$M_{n\text{P1}} = 20\,000 \text{ g.mol}^{-1}$$

$$DP_{\text{DMA}} \times M_{\text{DMA}} (\text{g.mol}^{-1}) + DP_{\text{SC5}} \times M_{\text{SC5}} (\text{g.mol}^{-1}) = M_{n\text{P1}} (\text{g.mol}^{-1})$$

$$\rightarrow 99 \times DP_{\text{DMA}} + 1212 \times DP_{\text{SC5}} = 20000 \quad (1)$$

+) Incorporation ratio of SC5 to DMA is 1.8%

$$\rightarrow \frac{DP_{\text{SC5}}}{DP_{\text{DMA}}} = 0.018 \quad (2)$$

From (1) and (2), it can be calculated that  $DP_{\text{DMA}} = 166$ ,  $DP_{\text{SC5}} = 3$

Thus, each copolymer **P1** chain contains 166 units of DMA and 3 units of **SC5** in average.

**b) Estimation of polymer degradation**

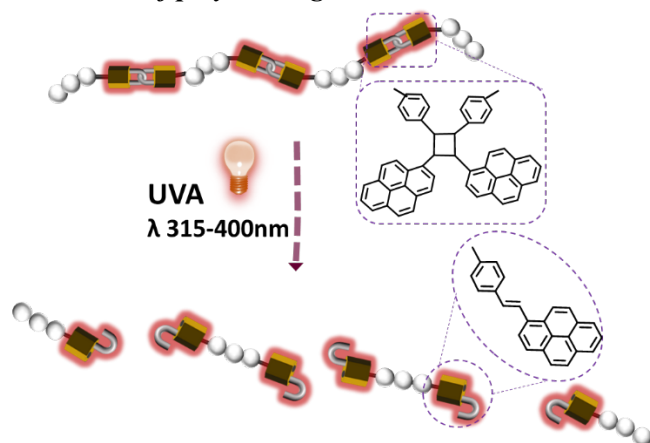

Figure S 25. Illustrative representation of the degradation of copolymer **P1** DMA-co-**SC5**.

As illustrated in above Figure, if all 3 styrylpyrene cycloadducts undergo cycloreversion reaction under UVA irradiation, each **P1** chain will disintegrate into 3+1=4 comparable fragments, assuming the even distribution of photoresponsive group in polymer chain. Hence, after complete degradation, Mn of the polymer will be:

$$Mn_{\text{degraded}} = \frac{Mn_{P1}}{4} = \frac{20000}{4} = 5000 \text{ g.mol}^{-1}$$

Thus, if **P1** is fully degraded, Mn should reduce by:

$$Mn \text{ reduction} = \frac{20000-5000}{20000} = 75 \%$$

## 6.2. Estimation of diblock copolymer P2

### a) Estimation of degree of polymerization

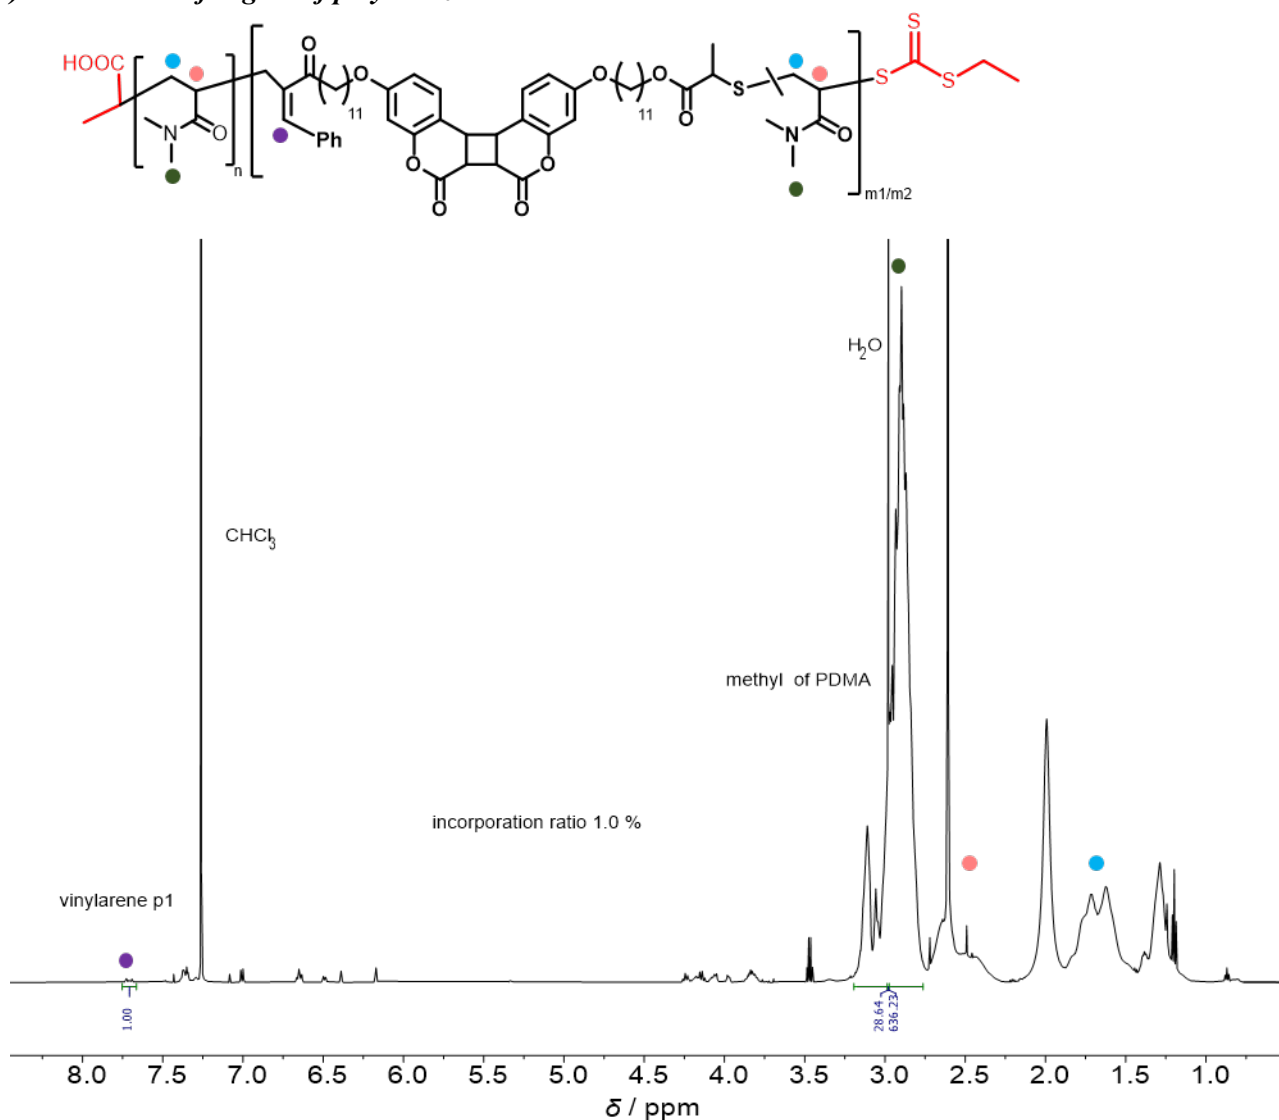

Figure S 26.  $^1\text{H}$  NMR spectra of **P2** (PDMA-*b*-P(DMA-co-**C3**)) in  $\text{CDCl}_3$ . Integral of dimethyl proton in PDMA ( $\delta = 2.9$  ppm) is obtained from subtraction of integral of water protons. The incorporation ratio of coumarin monomer **C3** to DMA is calculated from vinylarene proton of ring-opening product of **C3** and methyl protons of PDMA.

Derived from  $M_p$  of polymer:

$$M_p = DP \times M_{\text{monomer}}$$

$$M_{\text{DMA}} = 99 \text{ g.mol}^{-1}, M_{\text{C3}} = 894 \text{ g.mol}^{-1}$$

+) First block PDMA:  $M_p = 11000 \text{ g.mol}^{-1} \rightarrow$  polymerisation degree of DMA  $DP = 111$

+) In second block, denote  $DP_{\text{DMA}}$  and  $DP_{\text{C3}}$  as polymerisation degree of DMA and **C3**

then:

$$DP_{\text{DMA}} \times M_{\text{DMA}} (\text{g.mol}^{-1}) + DP_{\text{C3}} \times M_{\text{C3}} (\text{g.mol}^{-1}) + M_p_{\text{first block}} (\text{g.mol}^{-1}) = M_p_{\text{P2}} (\text{g.mol}^{-1})$$

$$\rightarrow 99 \times DP_{\text{DMA}} + 894 \times DP_{\text{C3}} + 11000 = 23000 \quad (3)$$

Incorporation ratio of **C3** to DMA in **P2** is 1.0%:  $\frac{DP_{\text{C3}}}{DP_{\text{DMA}} + 111} = 0.01 \quad (4)$

from (3) and (4), it can be calculated that  $DP_{\text{DMA}} = 103$  and  $DP_{\text{C3}} = 2$ .

Thus, **P2** is estimated to consist of one block of PDMA (111 units of DMA) and one block of copolymer of DMA (103 units) and coumarin monomer **C3** (2 units)

**b) Estimation of polymer degradation**

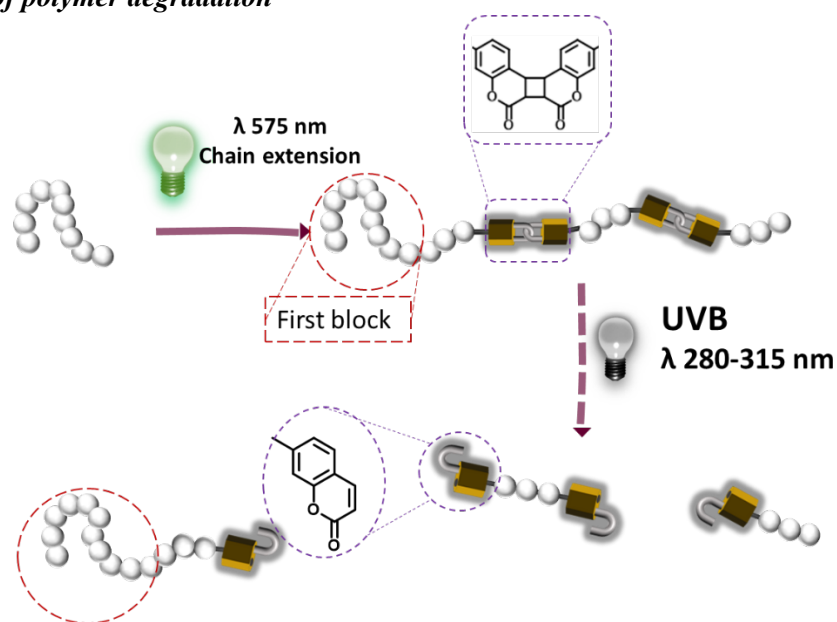

Figure S 27. Illustrative representation of the degradation of diblock copolymer **P2** PDMA-*b*-(DMA-co-C3)

Based on  $M_p$  of polymer, estimated structure of diblock **P2**: DMA<sub>111</sub>-*b*-(DMA<sub>103</sub>-co-C3<sub>2</sub>). As illustrated in above Figure, if all 2 coumarin cycloadducts undergo cycloreversion reaction under UVA irradiation, each **P2** chain will disintegrate into 2+1=3 fragments. The largest fragment is the one connected to the nondegradable first block and contains only half of the coumarin cycloadduct monomer. Assuming coumarin cycloadduct distributes evenly in the second block of **P2**, if disregards the first block in largest fragment, number of DMA units is equal for each fragment. Hence if **P2** is fully degraded,  $M_p$  of the product (mass of largest fragment) will be:

$$M_{p_{\text{degraded}}} = M_{p_{\text{first block}}} + \frac{DP_{DMA}}{3} \times M_{DMA} + \frac{1}{2} \times M_{C3}$$

$$\rightarrow M_{p_{\text{degraded}}} = 11,000 + \frac{103}{3} \times 99 + \frac{1}{2} \times 894 = 14,846 \text{ g.mol}^{-1}$$

**6.3. Calculation and estimation of triblock copolymer P3**

**a) Calculation of incorporation ratio of photoresponsive groups**

+) Incorporation ratio of photoresponsive groups (coumarin and styrylpyrene) is calculated from integral of vinylarene proton in copolymer resulted from ring opening polymerisation of both coumarin monomer **C3** and styrylpyrene monomer **SC5** ( $\delta=7.70$  ppm) and integral of 6 proton of DMA ( $\delta=2.90$  ppm).

$$\text{Incorporation ratio of both photoresponsive groups: } I_{\text{total}} = \frac{0.87}{418} \times 6 \times 100 = 1.3\%$$

+) Incorporation ratio of styrylpyrene is calculated from integral of 2 protons of cyclobutane ring ( $\delta=5.81$  and  $4.99$  ppm corresponding to two isomers of **SC5**) and integral of 6 proton of DMA ( $\delta=2.9$  ppm)

$$\rightarrow \text{incorporation ratio of SC5 to DMA: } I_{SC5} = \frac{0.82+0.4}{418} \times 6 \times 100 = 0.9\%$$

+) Incorporation ratio of C3:  $I_{C3} = I_{total} - I_{SC5} = 0.4\%$

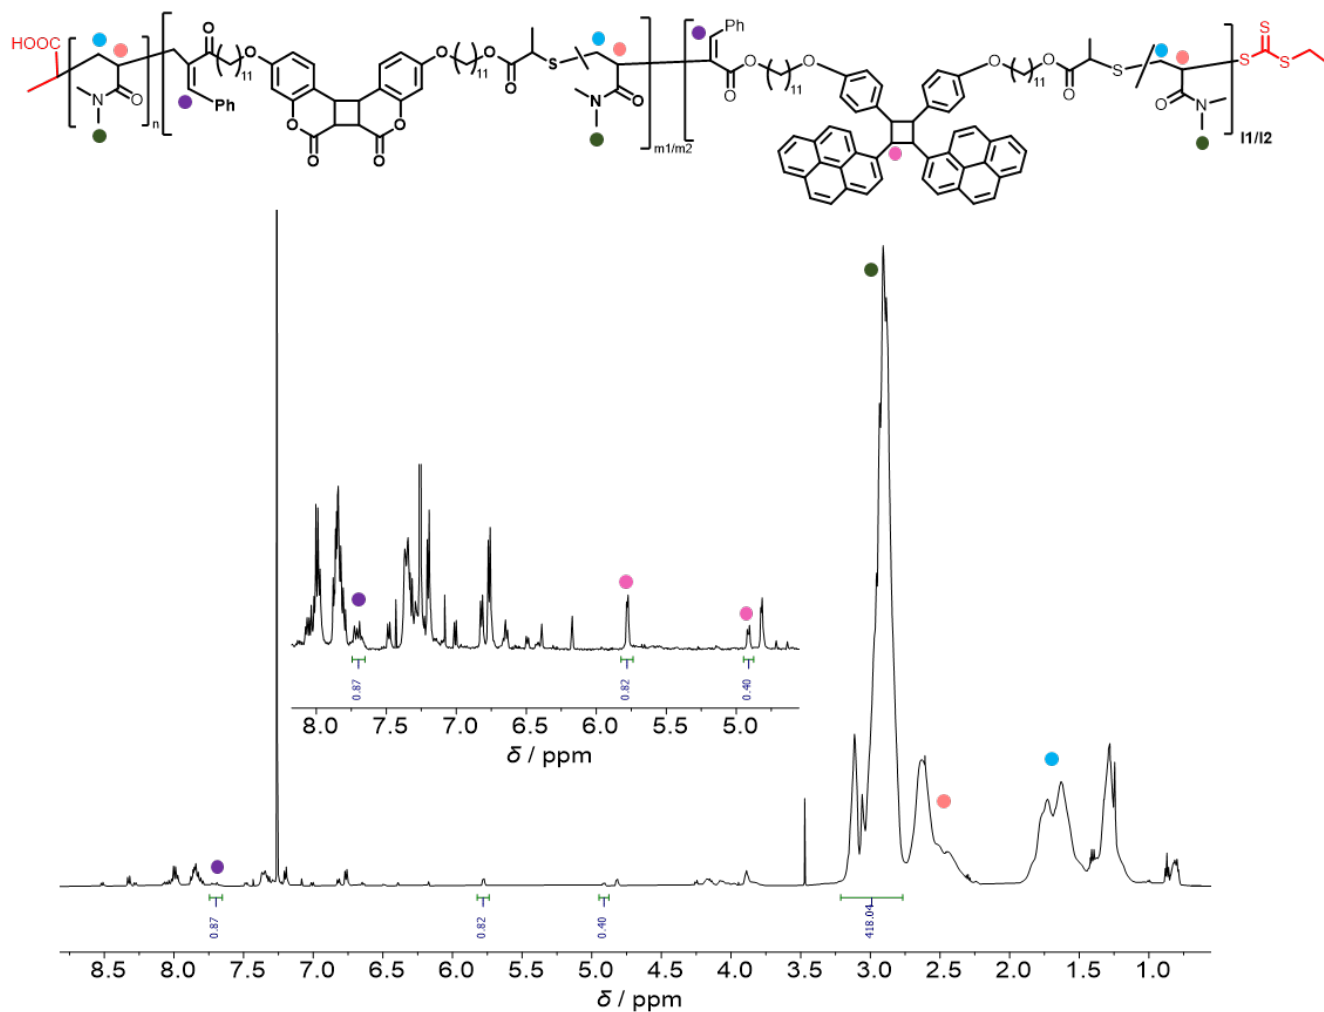

Figure S 28.  $^1H$  NMR of polymer **P3** acquired in  $CDCl_3$  with integrals of resonances used for incorporation ratio of photoresponsive groups in **P3**.

### b) Estimation of degree of polymerization

Derived from Mp of polymer:

$$M_p = DP \times M_{\text{monomer}}$$

$$M_{\text{DMA}} = 99 \text{ g}\cdot\text{mol}^{-1}, M_{\text{C3}} = 894 \text{ g}\cdot\text{mol}^{-1}$$

+) First block PDMA:  $M_p = 10000 \text{ g}\cdot\text{mol}^{-1} \rightarrow$  polymerisation degree of DMA  $DP = 101$

+) In second block, denote  $DP_{\text{DMA}(2)}$  and  $DP_{\text{C3}}$  as polymerisation degree of DMA and C3

then:

$$DP_{\text{DMA}(2)} \times M_{\text{DMA}} (\text{g}\cdot\text{mol}^{-1}) + DP_{\text{C3}} \times M_{\text{C3}} (\text{g}\cdot\text{mol}^{-1}) + M_p_{\text{first block}} (\text{g}\cdot\text{mol}^{-1}) = M_p_{\text{diblock}} (\text{g}\cdot\text{mol}^{-1})$$

$$\rightarrow 99 \times DP_{\text{DMA}(2)} + 894 \times DP_{\text{C3}} + 10000 = 21000 \quad (5)$$

$$\text{Incorporation ratio of C3 to DMA in P2 is 1.0\%: } \frac{DP_{\text{C3}}}{DP_{\text{DMA}(2)} + 101} = 0.01 \quad (6)$$

From (5) and (6), it can be calculated that  $DP_{\text{DMA}(2)} = 93$  and  $DP_{\text{C3}} = 2$ .

+) In third block, denote  $DP_{\text{DMA}(3)}$  and  $DP_{\text{SC5}}$  as polymerisation degree of DMA and SC5

then:

$$DP_{\text{DMA}(3)} \times M_{\text{DMA}} (\text{g}\cdot\text{mol}^{-1}) + DP_{\text{SC5}} \times M_{\text{SC5}} (\text{g}\cdot\text{mol}^{-1}) + M_p_{\text{diblock}} (\text{g}\cdot\text{mol}^{-1}) = M_p_{\text{P3}} (\text{g}\cdot\text{mol}^{-1})$$



$$\rightarrow 99 \times DP_{DMA(3)} + 1212 \times DP_{SC5} + 21000 = 78000 \quad (7)$$

Incorporation ratio of SC5 to DMA in **P3** is 0.9%:  $\frac{DP_{SC5}}{DP_{DMA(3)} + DP_{DMA(2)} + 101} = 0.009$

$$\leftrightarrow \frac{DP_{SC5}}{DP_{DMA(3)} + 93 + 101} = 0.009 \quad (8)$$

From (7) and (8), it can be calculated that  $DP_{DMA(3)} = 499$  and  $DP_{SC5} = 9$ .

In conclusion, triblock is estimated to consist of first block of PDMA (101 units), second block of copolymer of DMA and C3 (93 units of DMA, 2 units of C3) and third block of copolymer of DMA and SC5 (499 units of DMA, 6 units of SC5)

### c) Estimation of photodegradation

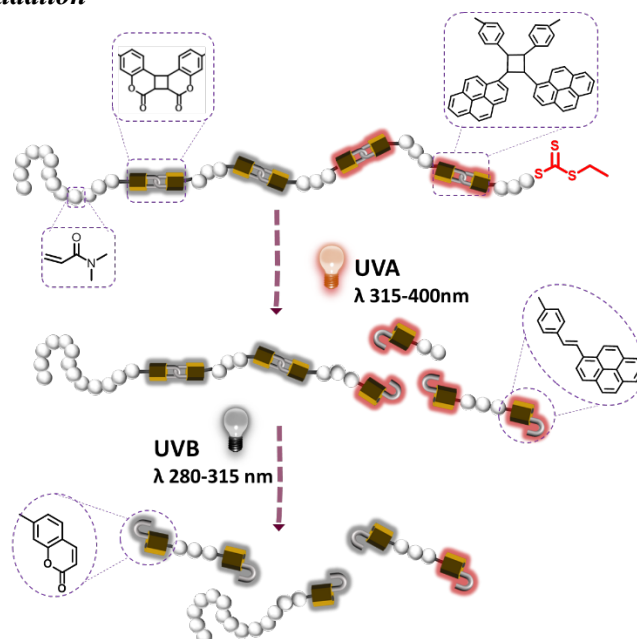

Figure S 29. Illustrative representation of the degradation of triblock copolymer **P3** PDMA-*b*-(DMA-co-C3)-*b*-(DMA-co-SC5)

Based on Mp of polymer, estimated structure of triblock **P3**: DMA<sub>101</sub>-*b*-(DMA<sub>93</sub>-co-C3<sub>2</sub>)-*b*-(DMA<sub>499</sub>-co-SC5<sub>6</sub>). The estimated Mp of the third block thus is 56673 g.mol<sup>-1</sup>. The full photodegradation of a copolymer equal to the third block would give 7 fragments with mass reduced to 8096 g.mol<sup>-1</sup> (see section 6.1.b). This fragment is still smaller than the first block of **P3**. Therefore, if the full degradation of **P3** will give the largest fragment similar to that from the full degradation of the diblock. Hence if **P3** is fully degraded, Mp of the product (mass of largest fragment) will be:

$$M_{p, \text{degraded}} = M_{p, \text{first block}} + \frac{DP_{DMA(2)}}{3} \times M_{DMA} + \frac{1}{2} \times M_{C3}$$

$$\rightarrow M_{p, \text{degraded}} = 10000 + \frac{93}{3} \times 99 + \frac{1}{2} \times 894 = 13,516 \text{ g.mol}^{-1}$$

## 6.4. Conversion and incorporation ratio in kinetic study of copolymerisation of DMA and SC5

### Feed ratio:

Molar ratio of SC5/DMA (denoted as *F*) in feed is calculated from <sup>1</sup>H NMR of polymerisation mixture. Specifically, SC5 is derived from integral of 8 pyrene aromatic proton resonances at 7.8-7.93 ppm, and DMA is derived from integral of 1 double bond proton resonance at 6.58 ppm (Figure S29). *F*=1.6%

$$F = \frac{n_{SC5 \text{ in polymerisation mixture at } 0 \text{ min}}}{n_{DMA \text{ in polymerisation mixture at } 0 \text{ min}}} = \frac{\frac{Integral_{pyrene}}{8}}{\frac{Integral_{DMA}}{1}} = 1.6\% \quad (9)$$

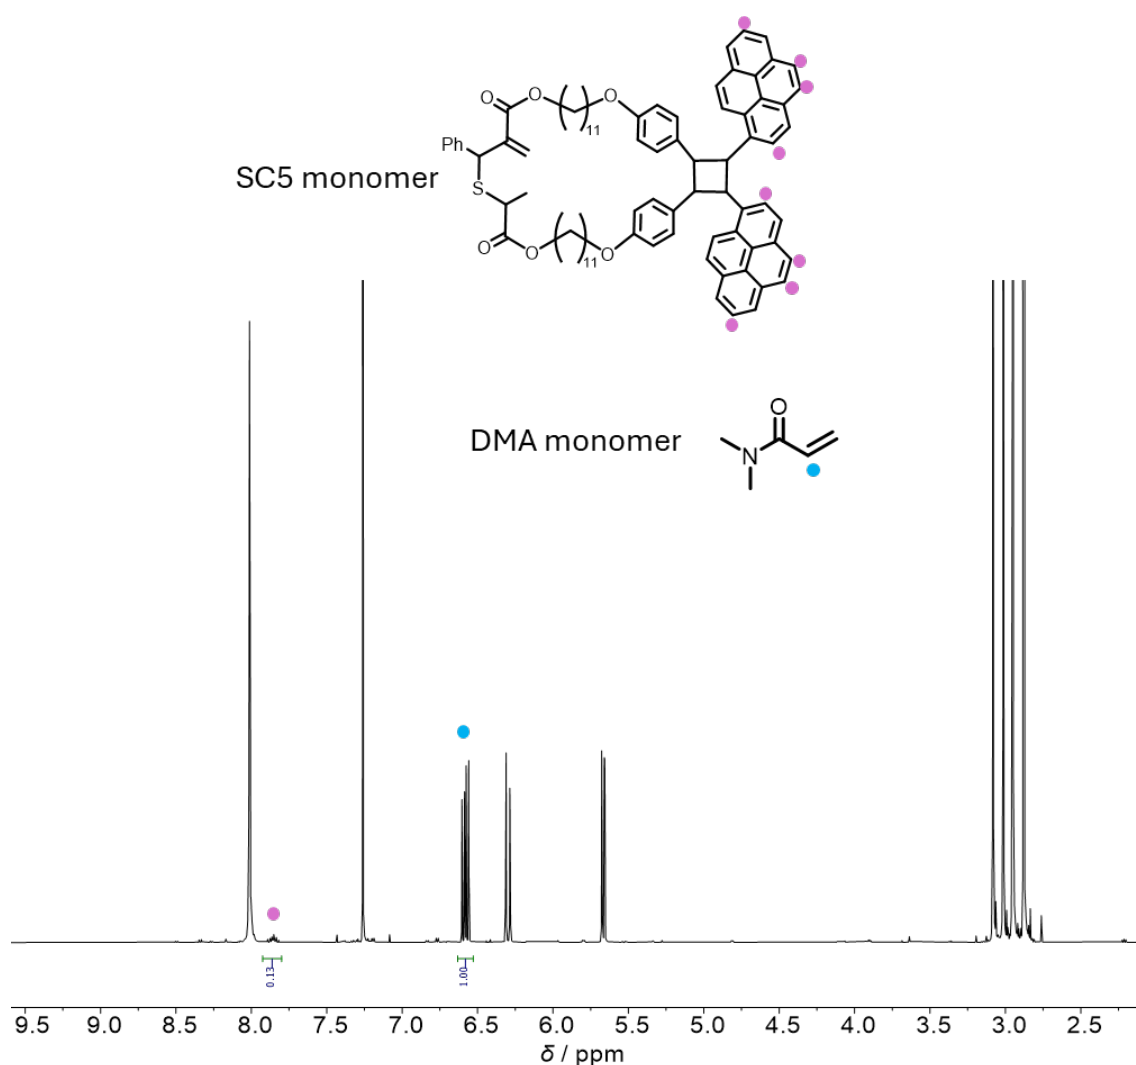

Figure S 30.  $^1H$  NMR spectra of polymerisation mixture at 0 min in kinetic study experiment (acquired in  $CDCl_3$ ).

### Conversion of DMA monomer

Conversion of DMA monomer is calculated from integral of 1 double bond proton of DMA at 6.58 ppm and integral of 6 methyl protons of PDMA ( $\delta = 2.90$  ppm) in  $^1H$  NMR of crude polymerisation product. The integral of methyl protons of PDMA is derived from subtraction of integral of DMF solvent and unreacted DMA monomers which are derived from integral of carbonyl proton of DMF and integral of double bond proton of DMA, respectively.

$$C_{DMA} = \frac{n_{DMA \text{ in copolymer}}}{n_{DMA \text{ in polymerisation mixture at } 0 \text{ min}}} = \frac{n_{DMA \text{ in copolymer}}}{n_{DMA \text{ in copolymer}} + n_{unreacted DMA}} = \frac{\frac{Integral_{PDMA}}{6}}{\frac{Integral_{PDMA}}{6} + Integral_{DMA}} \quad (10)$$

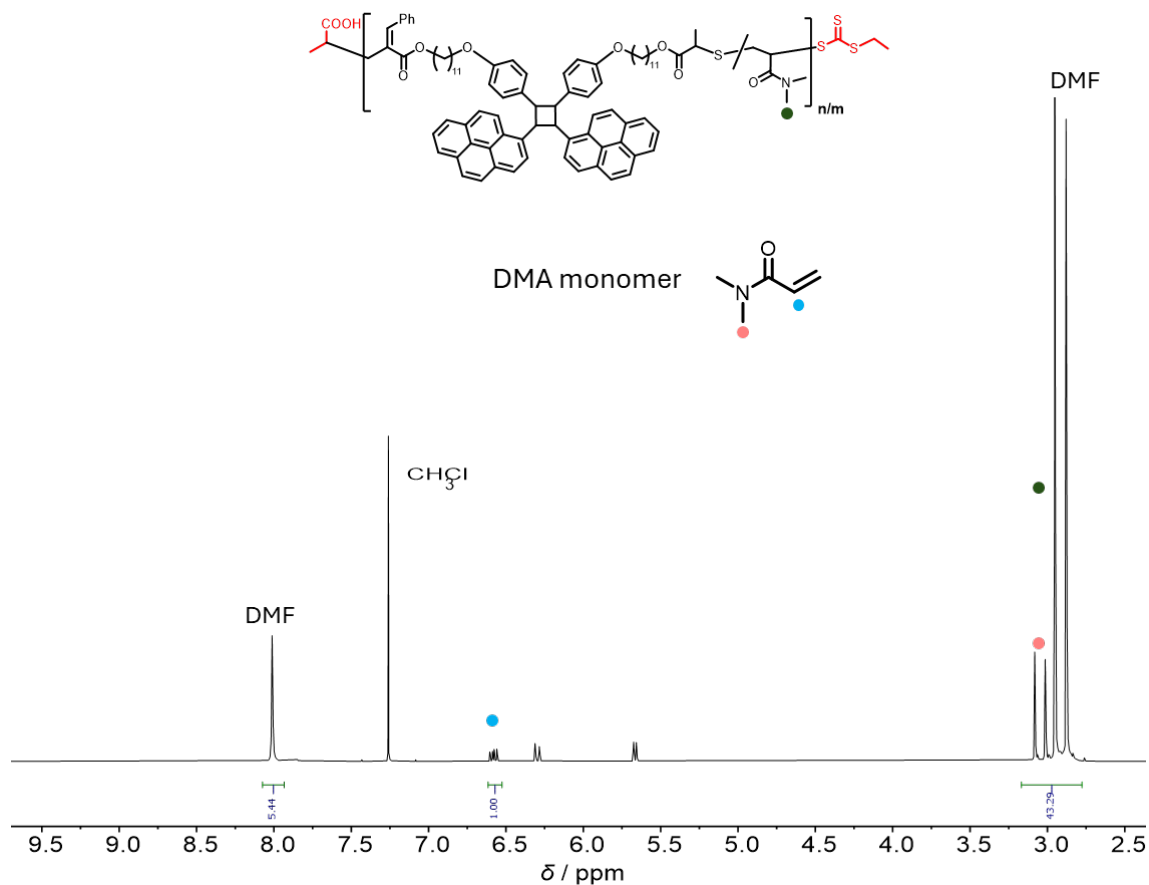

Figure S 31.  $^1\text{H}$  NMR spectra of crude polymerisation product obtained from kinetic study experiment at polymerisation time of 60 min (acquired in  $\text{CDCl}_3$ ).

#### ***Incorporation ratio of copolymer***

Incorporation ratio of styrylpyrene cycloadduct groups is calculated from integral of 8 pyrene aromatic protons at 7.8-7.93 ppm and integral of 6 protons of PDMA ( $\delta=2.90$  ppm) in the  $^1\text{H}$  NMR of the purified copolymer.

$$I = \frac{n_{\text{SC5 in copolymer}}}{n_{\text{DMA in copolymer}}} = \frac{\frac{\text{Integral}_{\text{pyrene}}}{8}}{\frac{\text{Integral}_{\text{PDMA}}}{6}} \quad (11)$$

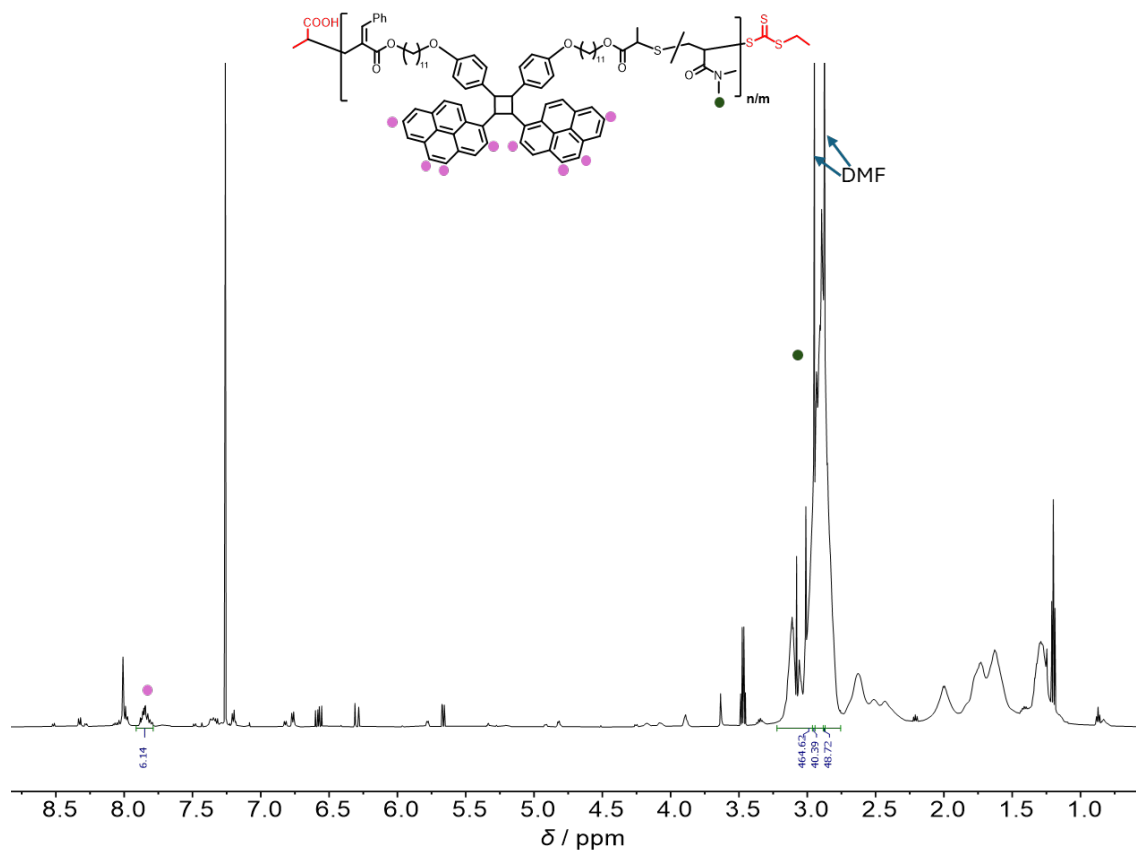

Figure S 32.  $^1\text{H}$  NMR spectra of purified copolymer obtained from kinetic study experiment at polymerisation time of 60 min (acquired in  $\text{CDCl}_3$ ). Integral of dimethyl proton in PDMA ( $\delta = 2.9$  ppm) is obtained from subtraction of integral of DMF protons.

### Conversion of SC5 monomer

Conversion of SC5 ( $C_{\text{SC5}}$ ) is calculated from conversion of DMA ( $C_{\text{DMA}}$ ), feed ratio (F) incorporation ratio of SC5 to DMA in copolymer (I) as follows:

+) from equation (9):

$$n_{\text{SC5 in polymerisation mixture at 0min}} = F \times n_{\text{DMA in polymerisation mixture at 0min}} \quad (12)$$

+) from equation (11):

$$n_{\text{SC5 in copolymer}} = I \times n_{\text{DMA in copolymer}} \quad (13)$$

+) From equations (12) and (13), conversion of SC5 monomer:

$$C_{SC5} = \frac{n_{SC5 \text{ in copolymer}}}{n_{SC5 \text{ in polymerisation mixture at } 0 \text{ min}}} = \frac{I \times n_{DMA \text{ in copolymer}}}{F \times n_{DMA \text{ in polymerisation mixture at } 0 \text{ min}}}$$

$$C_{SC5} = \frac{I}{F} \times \frac{n_{DMA \text{ in copolymer}}}{n_{DMA \text{ in polymerisation mixture at } 0 \text{ min}}}$$

$$C_{SC5} = \frac{I}{F} \times C_{DMA} \quad (14)$$

## 7. SANS APPENDIX

In the elastic SANS experiment, the neutrons with a wavelength  $\lambda$  scatter from the sample without changing energy. The incident neutrons on the sample have a momentum  $\vec{k}_i$  and the neutrons scattered by the sample have a momentum  $\vec{k}_s$ . The angle between the two vectors is the scattering angle,  $2\theta$ .

SANS data are acquired as a function of the momentum transfer:

$$\vec{q} = \vec{k}_s - \vec{k}_i,$$

where the magnitude of the momentum transfer is defined by:  $q = \frac{4\pi}{\lambda} \sin(\theta)$ .

Initial model-independent analysis has been performed using Guinier approximation and the power-law fit of the intermediate range of the data.

The middle-range  $q$  fits are all in the range of the  $q^{-2}$ , indicating scattering of a Gaussian polymer.

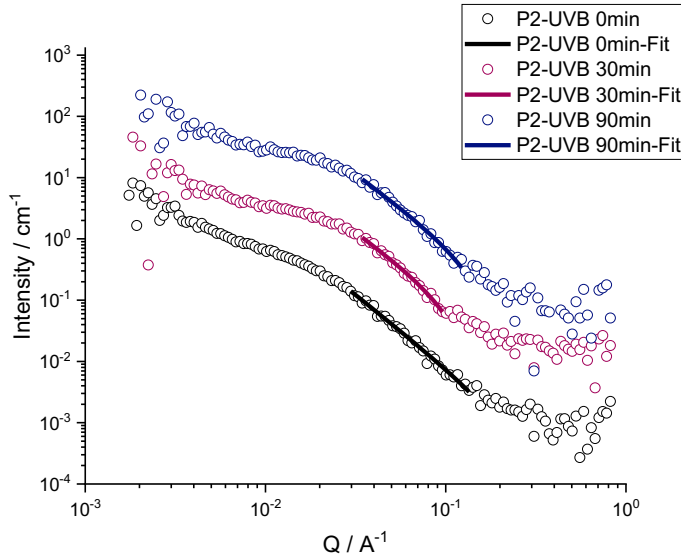

Figure S 33. Scattering intensity,  $I(q)$  plotted versus momentum transfer  $q$  obtained from SANS experiments of diblock polymer **P2** dispersion in water irradiated with UVB light for 0 min, 30 min and 90 min and their fit performed by SasView with model Power-Law for the middle-range range of the data. Note that the data and fit of **P2** irradiated with UVB 30 min and 90 min are offset for clarity by 10 and 100, respectively.

Radius of gyration has  $R_g$  been estimated using the Guinier approach and calculated directly from a distance distribution function,  $p(r)$ .

The Guinier approximation allows to estimate the  $R_g$  from the low  $q$  part of the  $I(q)$  as following:

$$I(q) = I(0) \exp\left(-\frac{R_g^2}{3} q^2\right), \quad qR_g < 1 \text{ for compact particles.}$$

One shall be careful selecting the  $q$ -range, do not take into account possible aggregation or concentration effects. The polymers solutions studies here are dilute, hence there is no structural factor to be taken into consideration. The aggregation effect, however, shows itself on the data.

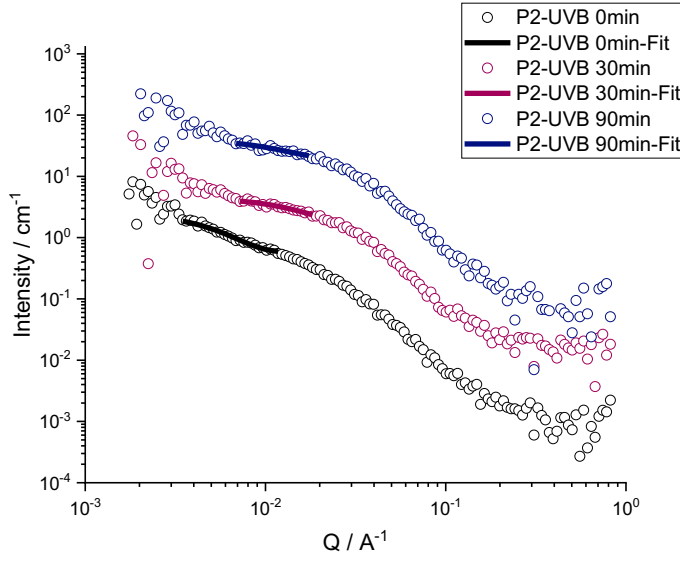

Figure S 34. Scattering intensity,  $I(q)$  plotted versus momentum transfer  $q$  obtained from SANS experiments of diblock polymer **P2** dispersion in water irradiated with UVB light for 0 min, 30 min and 90 min and their Guinier approximation fit performed by SasView in the low  $q$ -range. Note that the data and fit of **P2** irradiated with UVB 30 min and 90 min are offset for clarity by 10 and 100, respectively.

The relation between the scattering intensity and the density distribution inside a particle is given by the Fourier transformation:

$$I(q) = 4\pi \int_0^{\infty} p(r) \frac{\sin(qr)}{qr} dr$$

Where the distribution of interatomic distances,  $p(r)$ , is calculated as  $p(r) = \gamma(r) \cdot r^2$  where  $\gamma(r)$  is a spherically averaged autocorrelation function of the excess scattering density. The distribution becomes zero at  $r = 0$  and  $r = D_{max}$ , where  $D_{max}$ , is the maximum dimension of a particle (diameter for a case of a sphere).

$$p(r) = \frac{r^2}{2\pi^2} \int_0^{\infty} q^2 I(q) \frac{\sin qr}{qr} dq \quad [1]$$

$R_g$  can be calculated from  $p(r)$  as following:

$$R_g^2 = \frac{\int_V p(r) r^2 dr}{\int_V p(r) dr} \quad [2]$$

For a sphere, the radius  $R$  of it can be calculated from the  $R_g$  values as following:

$$R_g^2 = \frac{3}{5} R^2 \quad [3]$$

Below are results calculated using Primus from ATSAS software package<sup>6</sup>, assuming that the solutions are monodisperse, i.e. all particles have equal shape. This requirement is strong, considering possible presence of aggregation and potential unevenness in the shape considering polymers' crown of the particles. Here we are using  $p(r)$  to quantitatively compare the data, to describe general tendency of the structural changes observed in

the samples, i.e. position of its maximum and approximate value of the maximum dimension  $D_{max}$  of the particles.

Figure S30 shows normalised  $p(r)$  for all three data sets:

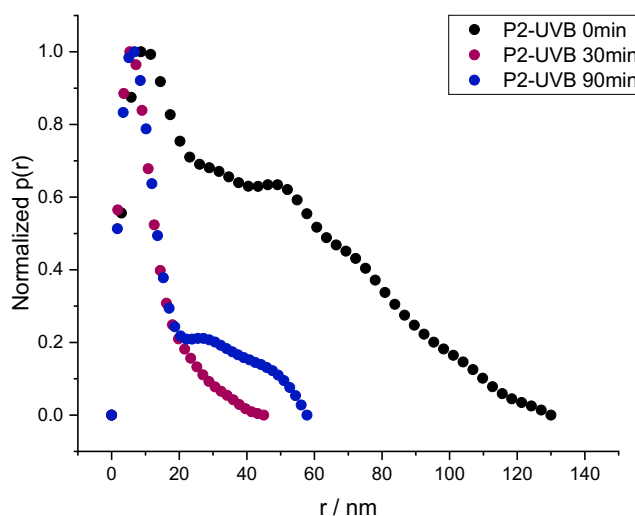

Figure S 35. Normalised  $p(r)$  for all three data sets.

Table S3 below summarise estimated values of the  $R_g$  and diameter for the three data sets:

Table S 3. Summary of estimated values of the  $R_g$  and radii for the three data sets.

|               | $R_g$ , nm<br>Guinier approximation | $R_g$ , nm<br>see eq [2] | Average particle<br>diameter $D$ , nm,<br>see eq [3] | * $D_{max}(p(r))$ , nm<br>see eq [1] |
|---------------|-------------------------------------|--------------------------|------------------------------------------------------|--------------------------------------|
| P2-UVB 0 min  | 33                                  | 36                       | ~100                                                 | 120-140                              |
| P2-UVB 30 min | 12                                  | 9                        | ~25-30                                               | 40-50                                |
| P2-UVB 90 min | 15                                  | 15                       | ~40                                                  | 50-60                                |

\* $D_{max}$  for these data sets is very sensitive to the choice of the lowest feasible value of  $q$ , hence the solution is not always stable, therefore there is a reasonable range presented for the  $D_{max}$ .

Next, the scattering intensity of the polymer micelle was modelled by spherical polymer micelle model via Sasview [SasView 5.0.5. <http://www.sasview.org/>]:

The form factor,  $P(q)$ , defined as following:

$$P(q) = N^2 \beta_s^2 \Phi(qr)^2 + N \beta_c^2 P_c(q) + 2N^2 \beta_s \beta_c S_{sc}(q) + N(N-1) \beta_c^2 S_{cc}(q)$$

$$\beta_s = V_{core} (\rho_{core} - \rho_{solvent})$$

$$\beta_c = V_{corona} (\rho_{corona} - \rho_{solvent})$$

where  $\rho_{core}$ ,  $\rho_{corona}$  and  $\rho_{solvent}$  are the scattering length densities  $sld_{core}$ ,  $sld_{corona}$  and  $sld_{solvent}$ .

During the modelling, the following parameters have been fixed:  $sld_{solvent}$  and  $d_{penetration}$  (the polymers chains do not penetrate the core).

The following parameter have been kept close for all three data sets:  $sld_{core}$ ,  $n_{densoty}$  and  $n_{agg}$ .

The following parameter have been set to a variable range:  $sld_{core}$  and  $sld_{solvent}$ .

The following parameter were let free:  $scale$ ,  $background$ ,  $v_{core}$ ,  $v_{corona}$ ,  $sld_{corona}$ ,  $radius_{core}$  ( $R_c$ ) of an individual polymer' head forming the core, and  $R_g$  of an individual polymer chains attached to the core.

*Table S 4. Structure values of polymer micelle obtained from performing fitting of experimental SANS data with spherical polymer micelle model via SasView.*

|                      | <b>Volume<sub>core</sub></b><br>(nm <sup>3</sup> ) | <b>Volume<sub>corona</sub></b><br>(nm <sup>3</sup> ) | <b><math>R_c</math></b><br>(nm) | <b><math>R_g</math></b><br>(nm) |
|----------------------|----------------------------------------------------|------------------------------------------------------|---------------------------------|---------------------------------|
| <b>UVB<br/>0min</b>  | 2.1*10 <sup>3</sup>                                | 3.6*10 <sup>3</sup>                                  | 6.73                            | 7.00                            |
| <b>UVB<br/>30min</b> | 0.6*10 <sup>3</sup>                                | 0.12*10 <sup>3</sup>                                 | 4.70                            | 3.80                            |
| <b>UVB<br/>90min</b> | 0.1*10 <sup>3</sup>                                | 0.1*10 <sup>3</sup>                                  | 4.50                            | 4.20                            |



## 8. DOSY APPENDIX

### *Diblock polymer P2*

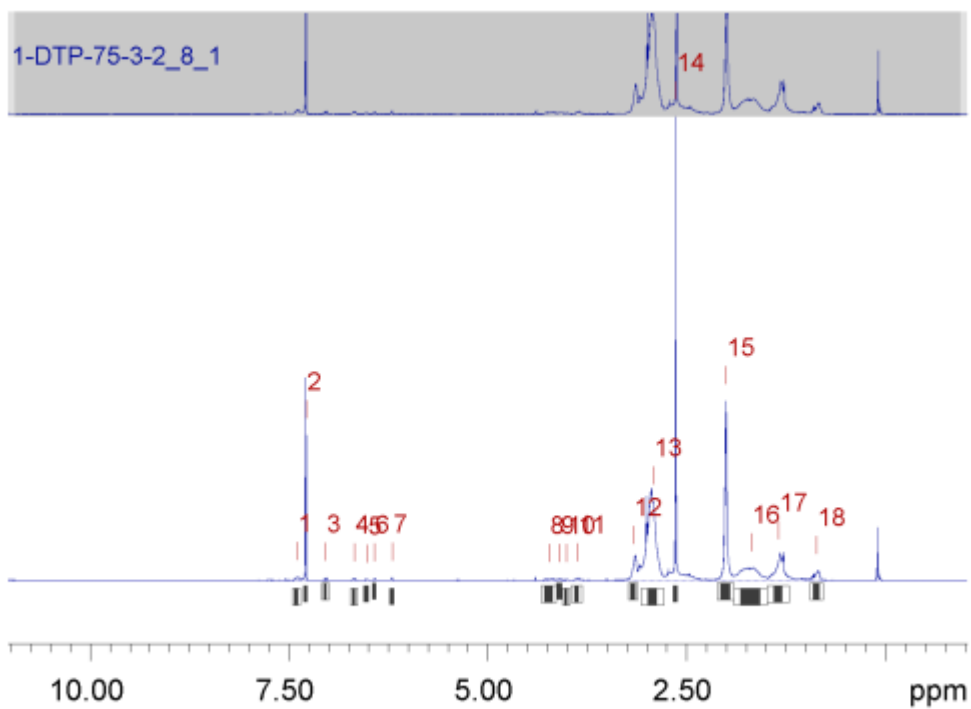

### Dosy/Fit

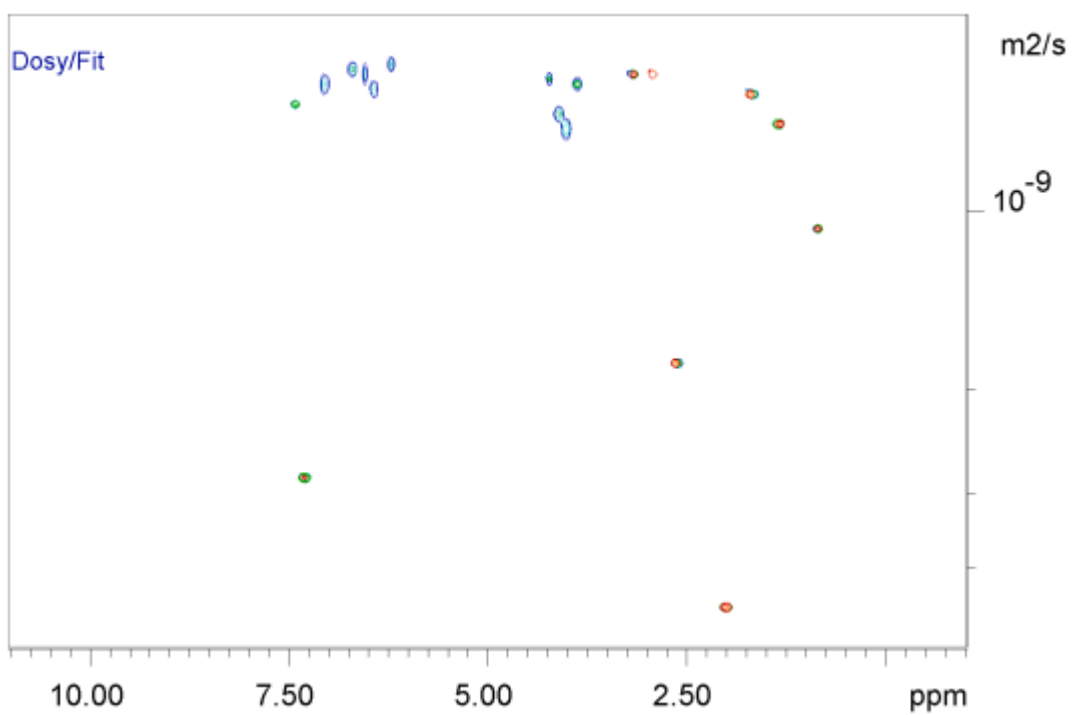

|                                        |                                                                                    |
|----------------------------------------|------------------------------------------------------------------------------------|
| Fitted function:                       | $f(x) = I_0 \cdot \exp(-D \cdot x^2 \cdot \gamma^2 \cdot \Delta^2 / 3) \cdot 10^4$ |
| used gamma:                            | 26752 rad/(s*Gauss)                                                                |
| used little delta:                     | 0.0026000 s                                                                        |
| used big delta:                        | 0.099900 s                                                                         |
| used gradient strength:                | variable                                                                           |
| Random error estimation of data:       | RMS per spectrum (or trace/plane)                                                  |
| Systematic error estimation of data:   | worst case per peak scenario                                                       |
| Fit parameter Error estimation method: | from fit using calculated y uncertainties                                          |
| Confidence level:                      | 95%                                                                                |
| Used peaks:                            | peaks from C:/Data/Chemists/FedericaS/1-DTP-75-3-2/8/pdata/1/peaklist1D.xml        |
| Used integrals:                        | area integral                                                                      |
| Used Gradient strength:                | all values (including replicates) used                                             |

| Peak name | F2 [ppm] | I <sub>0</sub> | error     | D [m <sup>2</sup> /s] | error     | fitInfo |
|-----------|----------|----------------|-----------|-----------------------|-----------|---------|
| 1         | 7.402    | 4.54e+08       | 1.578e+06 | 6.64e-10              | 5.292e-12 | Done    |
| 2         | 7.285    | 3.10e+09       | 1.581e+06 | 2.82e-09              | 3.287e-12 | Done    |
| 3         | 7.037    | 1.20e+08       | 1.479e+06 | 6.11e-10              | 1.734e-11 | Done    |
| 4         | 6.677    | 1.91e+08       | 1.476e+06 | 5.78e-10              | 1.029e-11 | Done    |
| 5         | 6.519    | 8.57e+07       | 1.275e+06 | 5.87e-10              | 2.013e-11 | Done    |
| 6         | 6.422    | 8.90e+07       | 1.111e+06 | 6.20e-10              | 1.782e-11 | Done    |
| 7         | 6.199    | 1.10e+08       | 1.199e+06 | 5.68e-10              | 1.422e-11 | Done    |
| 8         | 4.227    | 4.07e+08       | 2.138e+06 | 6.03e-10              | 7.288e-12 | Done    |
| 9         | 4.093    | 1.77e+08       | 1.384e+06 | 6.79e-10              | 1.216e-11 | Done    |
| 10        | 4.008    | 1.22e+08       | 1.564e+06 | 7.24e-10              | 2.128e-11 | Done    |
| 11        | 3.874    | 3.53e+08       | 1.824e+06 | 6.08e-10              | 7.231e-12 | Done    |
| 12        | 3.168    | 3.93e+09       | 1.672e+06 | 5.88e-10              | 5.766e-13 | Done    |
| 13        | 2.921    | 3.17e+10       | 2.592e+06 | 5.90e-10              | 1.111e-13 | Done    |
| 14        | 2.632    | 8.55e+09       | 1.579e+06 | 1.81e-09              | 7.606e-13 | Done    |
| 15        | 2.007    | 1.70e+10       | 3.726e+06 | 4.63e-09              | 2.329e-12 | Done    |
| 16        | 1.691    | 9.72e+09       | 3.203e+06 | 6.38e-10              | 4.831e-13 | Done    |
| 17        | 1.344    | 8.18e+09       | 2.645e+06 | 7.15e-10              | 5.297e-13 | Done    |
| 18        | 0.861    | 1.96e+09       | 2.307e+06 | 1.08e-09              | 2.872e-12 | Done    |

# Current fit display

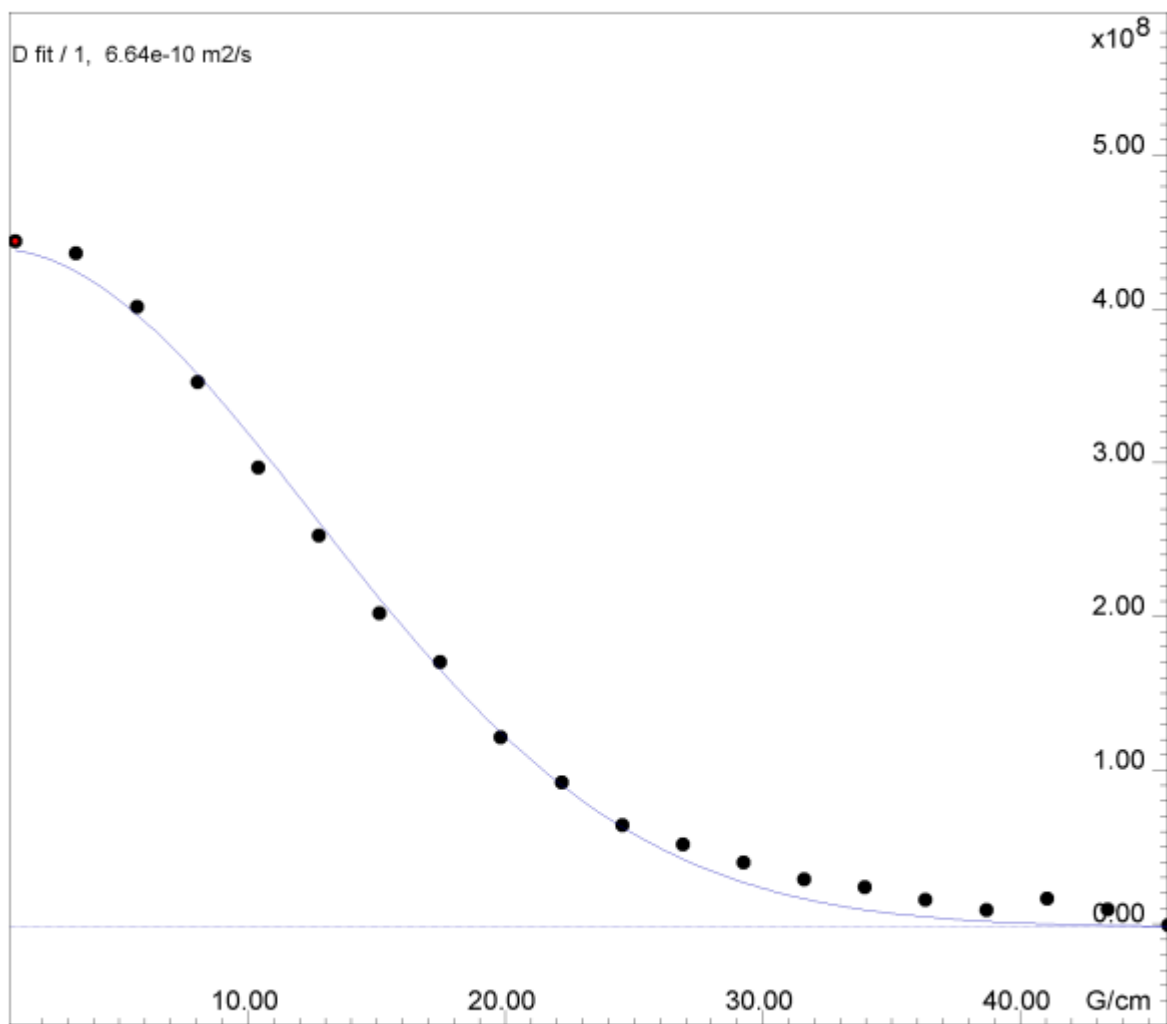

*Triblock polymer P3*

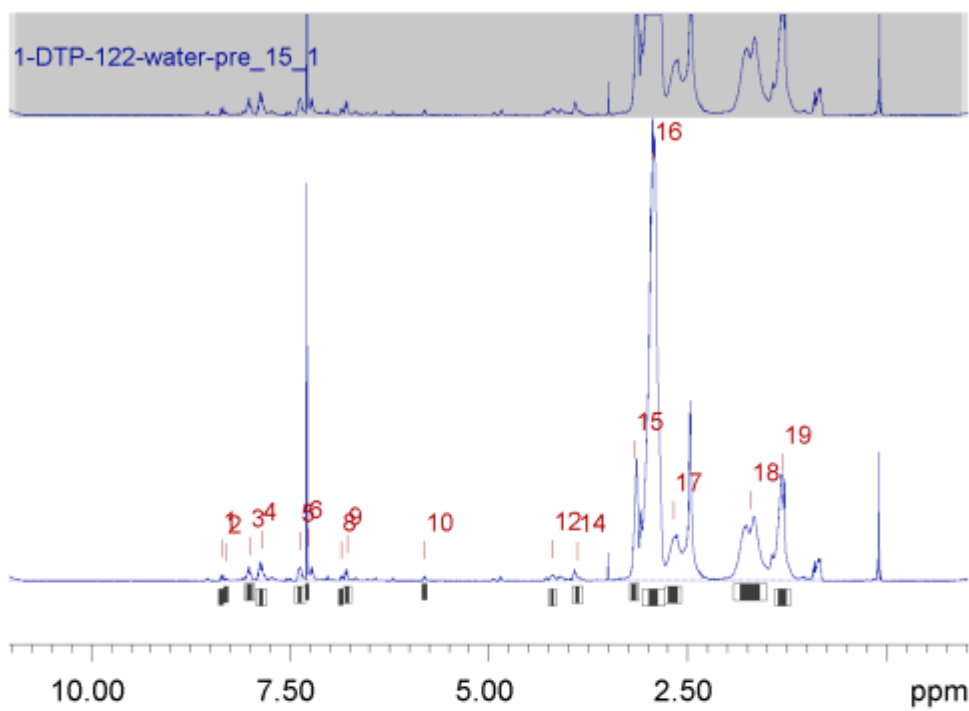

Dosy/Fit

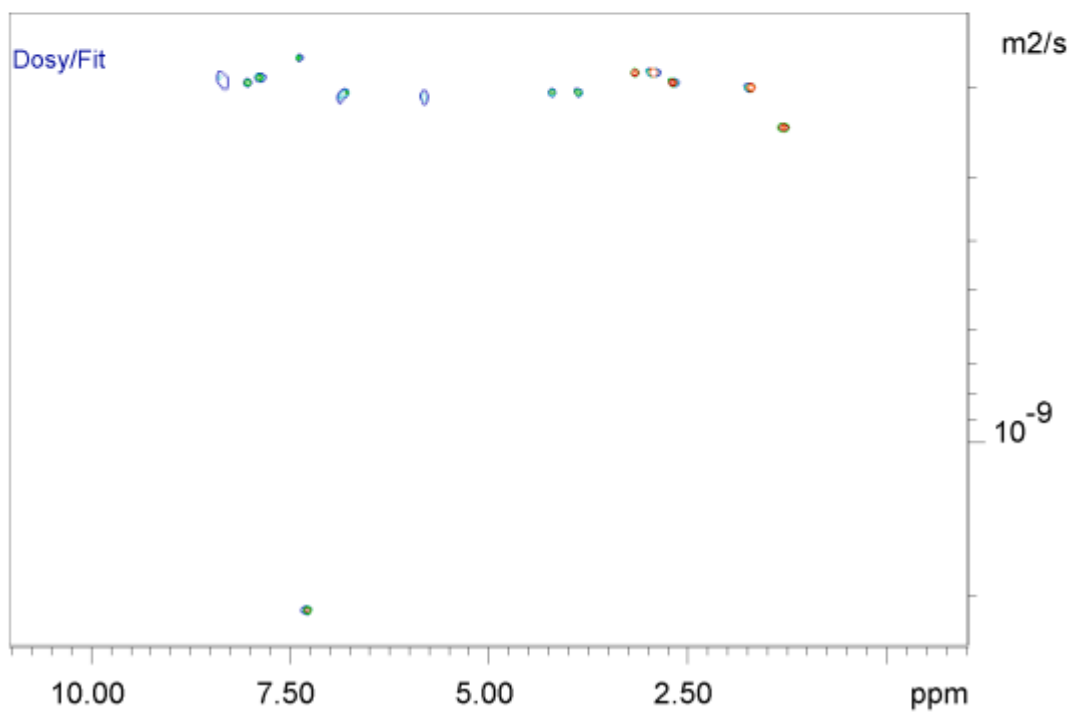

|                                        |                                                                                                                                |
|----------------------------------------|--------------------------------------------------------------------------------------------------------------------------------|
| Fitted function:                       | $f(x) = I_0 \cdot \exp(-D \cdot x^2 \cdot \gamma^2 \cdot \Delta^2)$<br>(bigDelta-littleDelta/3) <sup>2</sup> · 10 <sup>4</sup> |
| used gamma:                            | 26752 rad/(s·Gauss)                                                                                                            |
| used little delta:                     | 0.0028000 s                                                                                                                    |
| used big delta:                        | 0.099900 s                                                                                                                     |
| used gradient strength:                | variable                                                                                                                       |
| Random error estimation of data:       | RMS per spectrum (or trace/plane)                                                                                              |
| Systematic error estimation of data:   | worst case per peak scenario                                                                                                   |
| Fit parameter Error estimation method: | from fit using calculated y uncertainties                                                                                      |
| Confidence level:                      | 95%                                                                                                                            |
| Used peaks:                            | peaks from C:/Data/Chemists/FedericaS/1-DTP-122-water-pre/15/pdata/1/peaklist1D.xml                                            |
| Used integrals:                        | area integral                                                                                                                  |
| Used Gradient strength:                | all values (including replicates) used                                                                                         |

| Peak name | F2 [ppm] | I <sub>0</sub> | error     | D [m <sup>2</sup> /s] | error     | fitInfo |
|-----------|----------|----------------|-----------|-----------------------|-----------|---------|
| 1         | 8.357    | 2.01e+08       | 7.462e+05 | 1.91e-10              | 1.697e-12 | Done    |
| 2         | 8.294    | 1.19e+08       | 6.688e+05 | 1.95e-10              | 2.620e-12 | Done    |
| 3         | 8.004    | 1.05e+09       | 9.824e+05 | 1.94e-10              | 4.323e-13 | Done    |
| 4         | 7.855    | 1.68e+09       | 1.056e+06 | 1.91e-10              | 2.878e-13 | Done    |
| 5         | 7.371    | 1.33e+09       | 1.028e+06 | 1.75e-10              | 3.298e-13 | Done    |
| 6         | 7.274    | 3.24e+09       | 1.127e+06 | 2.13e-09              | 1.775e-12 | Done    |
| 8         | 6.851    | 2.30e+08       | 6.930e+05 | 2.08e-10              | 1.480e-12 | Done    |
| 9         | 6.774    | 6.04e+08       | 8.891e+05 | 2.06e-10              | 7.177e-13 | Done    |
| 10        | 5.802    | 1.83e+08       | 7.464e+05 | 2.07e-10              | 1.997e-12 | Done    |
| 12        | 4.192    | 5.69e+08       | 8.767e+05 | 2.05e-10              | 7.497e-13 | Done    |
| 14        | 3.881    | 9.20e+08       | 1.060e+06 | 2.05e-10              | 5.600e-13 | Done    |
| 15        | 3.164    | 1.01e+10       | 9.550e+05 | 1.87e-10              | 4.276e-14 | Done    |
| 16        | 2.926    | 9.31e+10       | 1.493e+06 | 1.89e-10              | 7.271e-15 | Done    |
| 17        | 2.678    | 1.10e+10       | 1.310e+06 | 1.94e-10              | 5.510e-14 | Done    |
| 18        | 1.707    | 2.49e+10       | 1.838e+06 | 1.98e-10              | 3.490e-14 | Done    |
| 19        | 1.299    | 1.58e+10       | 1.289e+06 | 2.38e-10              | 4.513e-14 | Done    |

# Current fit display

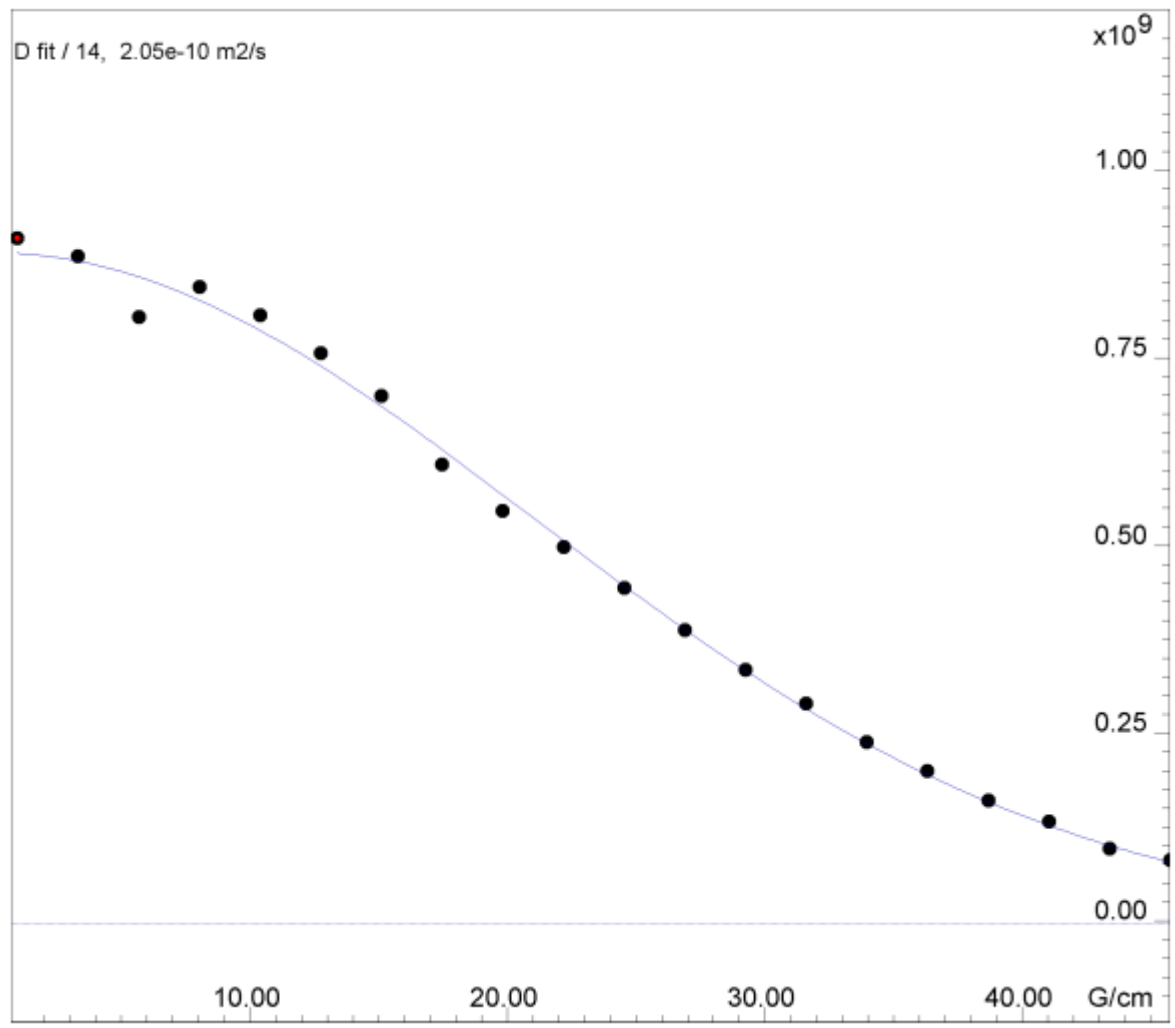

1. Gruending, T.; Guilhaus, M.; Barner-Kowollik, C., Fast and Accurate Determination of Absolute Individual Molecular Weight Distributions from Mixtures of Polymers via Size Exclusion Chromatography–Electrospray Ionization Mass Spectrometry. *Macromolecules* **2009**, *42* (17), 6366-6374.
2. Fulmer, G. R.; Miller, A. J.; Sherden, N. H.; Gottlieb, H. E.; Nudelman, A.; Stoltz, B. M.; Bercaw, J. E.; Goldberg, K. I., NMR chemical shifts of trace impurities: common laboratory solvents, organics, and gases in deuterated solvents relevant to the organometallic chemist. *Organometallics* **2010**, *29* (9), 2176-2179.
3. Sokolova, A.; Christoforidis, J.; Eltobaji, A.; Barnes, J.; Darmann, F.; Whitten, A. E.; de Campo, L., BILBY: Time-of-Flight Small Angle Scattering Instrument. *Neutron News* **2016**, *27* (2), 9-13.
4. Sokolova, A.; Whitten, A. E.; de Campo, L.; Christoforidis, J.; Eltobaji, A.; Barnes, J.; Darmann, F.; Berry, A., Performance and characteristics of the BILBY time-of-flight small-angle neutron scattering instrument. *Journal of Applied Crystallography* **2019**, *52* (1), 1-12.
5. Arnold, O.; Bilheux, J.-C.; Borreguero, J.; Buts, A.; Campbell, S. I.; Chapon, L.; Doucet, M.; Draper, N.; Leal, R. F.; Gigg, M., Mantid—Data analysis and visualization package for neutron scattering and  $\mu$  SR experiments. *Nuclear instruments and methods in physics research section a: accelerators, spectrometers, detectors and associated equipment* **2014**, *764*, 156-166.
6. Manalastas-Cantos, K.; Konarev, P. V.; Hajizadeh, N. R.; Kikhney, A. G.; Petoukhov, M. V.; Molodenskiy, D. S.; Panjkovich, A.; Mertens, H. D.; Gruzinov, A.; Borges, C., ATSAS 3.0: expanded functionality and new tools for small-angle scattering data analysis. *Journal of applied crystallography* **2021**, *54* (1), 343-355.
7. Do, P. T.; Poad, B. L.; Frisch, H., Programming Photodegradability into Vinylic Polymers via Radical Ring-Opening Polymerization. *Angewandte Chemie* **2023**, *135* (6), e202213511.
8. Huang, H.; Sun, B.; Huang, Y.; Niu, J., Radical Cascade-Triggered Controlled Ring-Opening Polymerization of Macrocyclic Monomers. *J Am Chem Soc* **2018**, *140* (33), 10402-10406.
9. Chambers, L. C.; Barner-Kowollik, C.; Barner, L.; Michalek, L.; Frisch, H., Photostationary State in Dynamic Covalent Networks. *ACS Macro Letters* **2022**, *11* (4), 532-536.
10. Foster, H.; Stenzel, M. H.; Chapman, R., PET-RAFT Enables Efficient and Automated Multiblock Star Synthesis. *Macromolecules* **2022**, *55* (14), 5938-5945.
11. Olson, R. A.; Levi, J. S.; Scheutz, G. M.; Lessard, J. J.; Figg, C. A.; Kamat, M. N.; Basso, K. B.; Sumerlin, B. S., Macromolecular Photocatalyst for Synthesis and Purification of Protein–Polymer Conjugates. *Macromolecules* **2021**, *54* (10), 4880-4888.
